# Supplementary material for: Manganese(iii)-mediated phosphinoyl radical reactions for stereoselective synthesis of phosphinoylated tetrahydronaphthalenes
Source: Royal Society of Chemistry journal article supplement (doi:10.1039/c1cc12343b), 2011-01-01
Supplement: c1cc12343b.pdf [file c1cc12343b.pdf]

## Supporting Information for

# Manganese(III)-mediated phosphinoyl radical reaction for stereoselective synthesis of phosphinoylated tetrahydronaphthalenes

Xiang-Qiang Pan,<sup>a</sup> Lu Wang,<sup>a</sup> Jian-Ping Zou<sup>\*a</sup> and Wei Zhang<sup>\*b</sup>

<sup>a</sup> Key Laboratory of Organic Synthesis of Jiangsu Province, College of Chemistry and Chemical Engineering, Suzhou University, 199 Renai Street, Suzhou, Jiangsu 215123, China

<sup>b</sup> Department of Chemistry, University of Massachusetts Boston, 100 Morrissey Boulevard, Boston, MA 02125, USA

E-mail: jpzou@suda.edu.cn (J. P. Zou); E-mail: wei2.zhang@umb.edu (W. Zhang)

### Table of contents

S-1 General information

S-2 Experimental procedures and compound characterizations

S-9 NMR Spectra

S-30 X-Ray crystal structures

### General information

All reactions were carried out under air. Solvents were dried by the standard procedures. <sup>1</sup>H and <sup>13</sup>C NMR spectra were determined in CDCl<sub>3</sub> on a Varian-Inova 300MHz or 400 MHz spectrometer and chemical shifts were reported in ppm from internal TMS( $\delta$ ). High resolution mass spectra were recorded on a MicroMass-TOF machine (EI). Column chromatography was performed with 200-300 mesh silica gel using flash column techniques. All of the reagents were used directly as obtained commercially unless otherwise noted.

Manganese triacetate, <sup>1</sup> (*E*)-5-aryl-2-pentenoic acid methyl ester <sup>2</sup> and 2-arylethyl styrene <sup>3</sup> were prepared according to the reported procedures.

1. W. J. De Klein, in *Organic Syntheses by oxidation with metal compounds*, Eds. W. J. Mijs and C. R. H. I. De Jonge. **1986**, Plenum Press, New York.
2. a) R. F. Nystrom, W. G. Brown, *J. Am. Chem. Soc.*, **1947**, *69*, 2548; b) J. Kang, G. J. Lim, S. K. Yoon, M. Y. Kim, *J. Org. Chem.*, **1995**, *60*, 564; c) Q. W. Zhang, R. M. Mohan, L. Cook, S. Kazanis, D. Peisach. *J. Org. Chem.*, **1993**, *58*, 7640.
3. a) H. Saumen, M. Biswajit, S. Debarshi, B. Sukanta, *Tetrahedron Lett.*, **2008**, *49*, 4057; b) X. Zhang, S. Sarkar, R. C. Larock *J. Org. Chem.* **2006**, *71*, 236.

### Preparation of 3-aryl-propan-1-ols

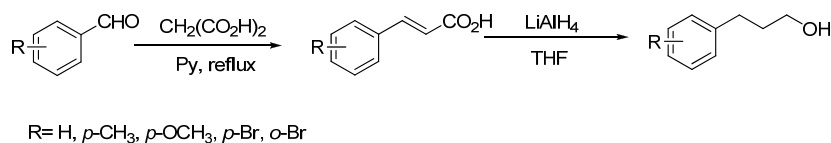

#### Typical procedure for the preparation of 3-phenyl-propan-1-ol

To a rapidly stirred suspension of LiAlH<sub>4</sub> (2.9g, 75 mmol, 3 equiv) in 20 mL of THF was added over 30 min a solution of cinnamate acid (3.7g, 25mmol) in 10 mL of THF at 0°C. After addition was complete, refluxing was continued for an additional 2 h, and then the mixture was cooled to room temperature, poured into ice water which was then poured into a solution of 5% HCl over ice and extracted once with ethyl ether (20 mL) and twice with 20 mL portions of EtOAc. The combined organic extract was washed with a saturated solution of NaHCO<sub>3</sub> (30 mL) and brine (30 mL) and dried over anhydrous MgSO<sub>4</sub>. Evaporation followed by flash column chromatographic purification afforded pure 3-phenyl-propan-1-ol (2.0 g, 60%) as an oil.

Other 3-aryl-propan-1-ols could be prepared from the substituted cinnamate acids, which were derived from their corresponding substituted benzaldehydes and malonic acid by standard procedure.

#### Preparation of ethyl *trans*-5-aryl-2-pentenoates

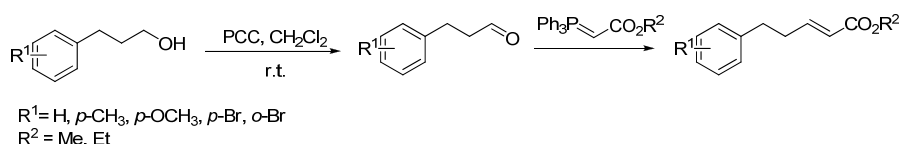

#### Typical procedure for the preparation of ethyl *trans*-5-phenyl-2-pentenoate

Pyridinium chlorochromate (2.85 g, 13.2 mmol) was added to 3-phenylpropan-1-ol (1.2 g, 8.8 mmol) in dichloromethane (25 mL). The mixture was well stirred for 2 h. When the oxidation was complete, the reaction mixture was diluted with diethyl ether and filtered through Florisil. Removal of the solvent gave the pure 3-phenylpropanal (0.968 g, 82%) as a colorless oil. Ethyl (triphenylphosphoranylidene) acetate (2.96 g, 8.5 mmol) was added to 3-phenylpropanal (0.950 g, 7.1 mmol) in dichloromethane (20 mL) at room temperature. The mixture was stirred for 1 h at the same temperature, diluted with H<sub>2</sub>O and extracted with ethyl acetate. The combined extracts were washed with water and brine, dried over MgSO<sub>4</sub>, and concentrated under reduced pressure. The residue was purified by flash chromatography on silica gel eluted with 1:3 ethyl ether/hexane to give ethyl *trans*-5-phenyl-2-pentenoate (1.29 g, 89%) as a colorless oil.

#### Preparation of 1,4-diaryl-1-butenes

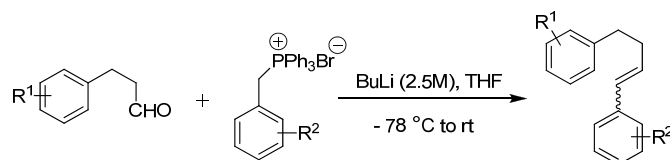

#### Typical procedure for the preparation of 1,4-diphenyl-1-butene

A suspension of benzyl triphenylphosphonium bromide (4.8 g, 11 mmol) in 10 mL of THF was added *n*-BuLi (5 mL, 2.5 M hexane solution) under nitrogen at -78°C. The resulting solution was stirred at 0°C for 20 min and then 3-phenyl-propionaldehyde (1.34g, 10 mmol) in 5 mL of THF was slowly added. After the mixture was stirred at 0°C for 30 min, the temperature was slowly raised to room temperature, Reaction was monitored by TLC. After completion, it was quenched with aqueous NH<sub>4</sub>Cl solution (10 mL) and extracted with ether (3×20mL). The combined organic layers were washed with brine, dried over anhydrous Na<sub>2</sub>SO<sub>4</sub>, concentrated and purified by flash

column chromatography over silica-gel eluted with petroleum ether/acetic acetate(10/1) to afford *E/Z* mixture of 1,4-diphenyl-1-butene (1.5g, 70%).

Other 1,4-diaryl-1-butenes could be prepared from the substituted benzyl triphenylphosphonium bromides, which were derived from their corresponding substituted benzyl bromides and  $\text{Ph}_3\text{P}$  by standard procedure.

#### Preparation of *cis*-1,4-diphenyl-1-butene

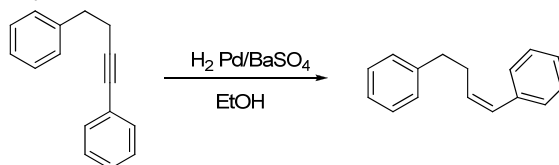

To a solution of 1,4-diphenyl-1-butyne (0.5 g, 2.42 mmol) in absolute ethanol (30 ml) was added Lindlar catalyst (0.05 g), the flask was evacuated, purged with hydrogen three times, and the mixture was stirred under hydrogen atmosphere for 12 h. The reaction was filtered over celite, washed with DCM twice (2×10mL). Evaporation followed by flash column chromatograph on silica gel eluted with 10:1 petroleum ether/acetic acetate to afford *cis*-1,4-diphenyl-1-butene (0.42 g, 85%) as an oil.  $^1\text{H}$  NMR ( $\text{CDCl}_3$ , 400 MHz):  $\delta$  7.32-7.19 (m, 10H), 6.47 (d,  $J = 12.3\text{Hz}$ , 1H), 5.78-5.71 (m, 1H), 2.85-2.79 (m, 2H), 2.73-2.67 (m, 2H).

#### Methyl 2-(diphenylphosphoryl)-1,2,3,4-tetrahydronaphthalene-1-carboxylate (8a)

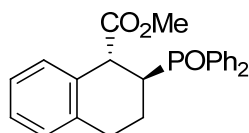

$^1\text{H}$  NMR (400 MHz,  $\text{CDCl}_3$ ):  $\delta$  7.82-7.92 (m, 4H), 7.49-7.52 (m, 6H), 7.06-7.23 (m, 4H), 4.27 (dd,  $J = 8.5, 15.3\text{ Hz}$ , 1H), 3.38-3.51 (m, 1H), 3.27 (s, 3H), 2.75-2.90 (m, 2H), 2.01-2.10 (m, 1H), 1.75-1.88 (m, 1H);  $^{13}\text{C}$  NMR (100 MHz,  $\text{CDCl}_3$ ):  $\delta$  174.9, 137.8, 132.6, 132.2 (d,  $J = 9.3\text{ Hz}$ ), 131.7 (d,  $J = 8.6\text{ Hz}$ ), 129.6, 129.4 (d,  $J = 11.3\text{ Hz}$ ), 129.2, 129.1, 127.7, 127.2, 52.8, 44.1, 37.0 (d,  $J = 72.1\text{ Hz}$ ), 29.7 (d,  $J = 13.2\text{ Hz}$ ), 22.4;  $^{31}\text{P}$  NMR (122 MHz,  $\text{CDCl}_3$ ):  $\delta$  34.5. HRMS ( $\text{M}^+$ ):  $m/z$  (%), calcd for  $\text{C}_{24}\text{H}_{23}\text{O}_3\text{P}$  390.1385, found 390.1380 ( $\text{M}^+$ , 19.42).

#### Ethyl 2-(diphenylphosphoryl)-1-methyl-1,2,3,4-tetrahydronaphthalene-1-carboxylate (8b)

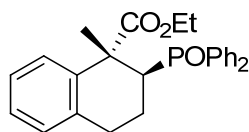

$^1\text{H}$  NMR (400 MHz,  $\text{CDCl}_3$ ):  $\delta$  7.72-7.78 (m, 2H), 7.63-7.68 (m, 2H), 7.36-7.48 (m, 6H), 7.17-7.23 (m, 3H), 6.91 (d,  $J = 6.6\text{Hz}$ , 1H), 3.82-3.90 (m, 2H), 2.93-2.99 (m, 1H), 2.70-2.77 (m, 1H), 2.50 (td,  $J = 8.3, 13.6\text{Hz}$ , 1H), 1.90-1.99 (m, 2H), 1.27 (d,  $J = 7.0\text{ Hz}$ , 3H), 1.16 (t,  $J = 7.0\text{ Hz}$ , 3H);  $^{13}\text{C}$  NMR (100 MHz,  $\text{CDCl}_3$ ):  $\delta$  175.0 (d,  $J = 6.8\text{ Hz}$ ), 141.3, 134.1 (d,  $J = 61.1\text{ Hz}$ ), 133.2 (d,  $J = 63.4\text{ Hz}$ ), 132.5, 132.0, 131.6 (d,  $J = 9.1\text{Hz}$ ), 131.3 (d,  $J = 8.3\text{ Hz}$ ), 129.1, 128.9 (d,  $J = 21.7\text{Hz}$ ), 126.6, 61.2, 39.4, 39.2 (d,  $J = 70.3\text{ Hz}$ ), 34.0 (d,  $J = 8.5\text{Hz}$ ), 29.8, 15.5, 14.5. HRMS ( $\text{M}^+$ ):  $m/z$  (%), calcd for  $\text{C}_{26}\text{H}_{27}\text{O}_3\text{P}$  418.1698, found 420.1853 ( $\text{M}^+ + 2\text{H}$ , 3.04).

#### Methyl 7-*tert*-butyl-2-(diphenylphosphoryl)-3-methyl-1,2,3,4-tetrahydronaphthalene-1-carboxylate (8d)

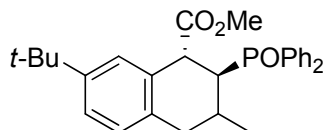

$^1\text{H}$  NMR (400 MHz,  $\text{CDCl}_3$ ):  $\delta$  7.88-8.02 (m, 4H), 7.46-7.54 (m, 6H), 7.23(s, 1H), 7.16 (d,  $J = 7.8$  Hz, 1H), 6.97 (d,  $J = 7.9$  Hz, 1H), 4.45 (dd,  $J = 9.6, 14.4$  Hz, 1H), 3.44-3.48 (m, 1H), 3.10 (s, 3H), 3.02-3.06 (m, 1H), 2.50-2.56 (m, 2H), 1.24 (s, 9H), 0.94 (d,  $J = 6.5$  Hz, 3H);  $^{13}\text{C}$  NMR (100 MHz,  $\text{CDCl}_3$ ):  $\delta$  175.1, 149.8, 132.5 (d,  $J = 1.7$  Hz), 132.2 (d,  $J = 15.4$  Hz), 132.2, 131.5 (d,  $J = 8.8$  Hz), 130.1, 129.5 (d,  $J = 11.3$  Hz), 128.9 (d,  $J = 11.4$  Hz), 125.5, 124.8, 52.5 (d,  $J = 1.6$  Hz), 41.1 (d,  $J = 70.9$  Hz), 38.1 (d,  $J = 13.7$  Hz), 34.9, 31.9, 28.2, 21.8, 16.2;  $^{31}\text{P}$  NMR (122 MHz,  $\text{CDCl}_3$ ):  $\delta$  32.2. HRMS ( $\text{M}^+$ ):  $m/z$  (%), calcd. for  $\text{C}_{29}\text{H}_{33}\text{O}_3\text{P}$  460.2167, found 460.2171( $\text{M}^+$ , 6.65).

**Methyl 2-(diphenylphosphoryl)-4-methyl-1,2,3,4-tetrahydronaphthalene-1-carboxylate (8e)**

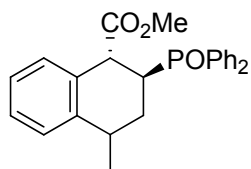

$^1\text{H}$  NMR (400 MHz,  $\text{CDCl}_3$ ):  $\delta$  7.70-7.80 (m, 4H), 7.39-7.44 (m, 6H), 7.01-7.19 (m, 4H), 4.16-4.22 (m, 1H), 3.54-3.56 (m, 1H), 3.17 (s, 1.2H), 3.13 (s, 1.8H), 2.85-2.95 (m, 1H), 1.84-1.97 (m, 1H), 1.49-1.73 (m, 1H), 1.30(d,  $J = 6.8$  Hz, 1.8H), 1.18 (d,  $J = 6.8$  Hz, 1.2H);  $^{13}\text{C}$  NMR (100 MHz,  $\text{CDCl}_3$ ):  $\delta$  174.8, 174.7, 142.4, 142.3, 132.4, 132.4, 132.3, 132.2, 132.1, 131.6, 131.6, 131.5, 131.5, 129.3 (d,  $J = 17.9$  Hz), 129.3, 129.0, 128.9(d,  $J = 21.0$  Hz), 128.7, 127.7 (d,  $J = 15.5$  Hz), 127.0 (d,  $J = 11.5$  Hz), 125.9, 52.7, 52.6 (d,  $J = 1.26$  Hz), 44.6, 43.4, 32.9, 32.8, 32.7 (d,  $J = 2.2$  Hz), 31.5, 31.3, 30.0 (d,  $J = 41.1$  Hz), 28.1, 22.8, 20.0. HRMS ( $\text{M}^+$ ):  $m/z$  (%), calcd. for  $\text{C}_{25}\text{H}_{25}\text{O}_3\text{P}$  404.1541, found 404.1536( $\text{M}^+$ , 11.13).

**Methyl 2-(diphenylphosphoryl)-7-methyl-1,2,3,4-tetrahydronaphthalene-1-carboxylate (8f)**

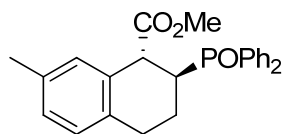

$^1\text{H}$  NMR (400 MHz,  $\text{CDCl}_3$ ):  $\delta$  7.85-7.87 (m, 4H), 7.47-7.52 (m, 6H), 7.02(s, 1H), 6.94 (t,  $J = 8.2$  Hz, 2H), 4.23 (dd,  $J = 8.6, 15.2$  Hz, 1H), 3.46-3.37 (m, 1H), 3.28(s, 3H), 2.72-2.84 (m, 2H), 2.23 (s, 3H), 2.01-2.08 (m, 1H), 1.74-1.80 (m, 1H);  $^{13}\text{C}$  NMR (75 MHz,  $\text{CDCl}_3$ ):  $\delta$  174.6, 136.2, 134.3, 132.1 (d,  $J = 4.4$  Hz), 132.0(d,  $J = 4.0$  Hz), 131.9 (d,  $J = 2.7$  Hz), 131.8 (d,  $J = 4.4$  Hz), 131.4 (d,  $J = 8.5$  Hz), 129.1 (d,  $J = 1.9$  Hz), 128.8 (d,  $J = 10.6$  Hz), 128.4 (d,  $J = 35.2$  Hz), 52.4, 43.7, 36.7 (d,  $J = 72.5$  Hz), 29.0 (d,  $J = 12.4$  Hz), 22.2, 21.3. HRMS ( $\text{M}^+$ ):  $m/z$  (%), calcd for  $\text{C}_{25}\text{H}_{25}\text{O}_3\text{P}$  404.1541, found 404.1543( $\text{M}^+$ , 8.84).

**Methyl 2-(diphenylphosphoryl)-7-methoxy-1,2,3,4-tetrahydronaphthalene-1-carboxylate (8g)**

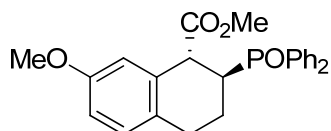

$^1\text{H}$  NMR (400 MHz,  $\text{CDCl}_3$ ):  $\delta$  7.82-7.91 (m, 4H), 7.46-7.51(m, 6H), 6.97 (d,  $J = 8.3$  Hz, 1H), 6.77 (s, 1H), 6.69 (d,  $J = 8.3$  Hz, 1H), 4.24 (dd,  $J = 8.6, 15.2$  Hz, 1H), 3.70 (s, 3H), 3.37-3.42 (m, 1H), 3.27 (s, 3H), 2.74-2.77 (m, 2H), 2.00-2.06 (m, 1H), 1.76-1.80 (m, 1H);  $^{13}\text{C}$  NMR (75 MHz,  $\text{CDCl}_3$ ): 174.7 (d,  $J = 2.9$  Hz), 158.6, 133.4 (d,  $J = 8.1$  Hz), 132.5 (d,  $J = 2.5$  Hz), 132.4 (d,  $J = 2.5$  Hz), 132.2 (d,  $J = 9.1$  Hz), 131.7 (d,  $J = 9.6$  Hz), 131.3 (d,  $J = 6.7$  Hz), 130.4, 131.0 (d,  $J = 244.5$  Hz), 129.9, 129.4 (d,  $J = 11.4$  Hz), 129.0 (d,  $J = 11.4$  Hz), 113.8 (d,  $J = 4.0$  Hz), 55.8, 52.8, 44.2, 37.0 (d,  $J = 72.1$  Hz), 29.0 (d,  $J = 12.7$  Hz), 22.6. HRMS ( $\text{M}^+$ ):  $m/z$  (%), calcd for  $\text{C}_{25}\text{H}_{25}\text{O}_4\text{P}$  420.1490,

found 420.1489( $M^+$ , 3.04).

#### Methyl 7-bromo-2-(diphenylphosphoryl)-1,2,3,4-tetrahydronaphthalene-1-carboxylate (8h)

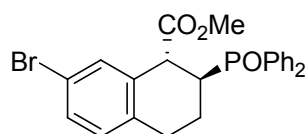

$^1H$  NMR (400 MHz,  $CDCl_3$ ):  $\delta$  7.92-7.83 (m, 4H), 7.48-7.54 (m, 6H), 7.22 (d,  $J = 6.7$ Hz, 1H), 7.11 (t,  $J = 6.1$ Hz, 1H), 7.06 (d,  $J = 6.8$ Hz, 1H), 4.28 (dd,  $J = 8.1, 15.4$ Hz, 1H), 3.42-3.47 (m, 1H), 3.28(s, 3H), 2.77-2.90 (m, 2H), 2.03-2.11 (m, 1H), 1.79-1.85 (m, 1H);  $^{13}C$  NMR (75 MHz,  $CDCl_3$ ):  $\delta$  175.0(d,  $J = 3.3$ Hz), 137.9, 132.7, 132.6, 132.5 (d,  $J = 2.4$  Hz), 132.3 (d,  $J = 9.2$  Hz), 131.8 (d,  $J = 8.6$ Hz), 129.5 (d,  $J = 11.3$  Hz), 129.4 (d,  $J = 40.5$  Hz), 129.1 (d,  $J = 11.5$  Hz), 127.4 (d,  $J = 37.7$  Hz), 52.9, 44.1, 37.1 (d,  $J = 72.0$  Hz), 29.8 (d,  $J = 11.5$  Hz), 22.5. HRMS ( $M^+$ ):  $m/z$  (%), calcd for  $C_{24}H_{22}BrO_3P$  468.0490, found 390.1397( $M^+-Br^-$ , 11.54).

#### 1-Phenyl-2-(diphenylphosphoryl)-1,2,3,4-tetrahydronaphthalene (15a)

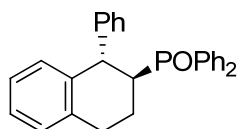

$^1H$  NMR (400 MHz,  $CDCl_3$ ):  $\delta$  7.74-7.79 (m, 2H), 7.56-7.60 (m, 2H), 7.40-7.44 (m, 3H), 7.29-7.33 (m, 1H), 7.21-7.23 (m, 2H), 7.00-7.05 (m, 2H), 6.92-6.95 (m, 4H), 6.78-6.80 (m, 2H), 6.71 (d,  $J = 7.7$ Hz, 1H), 4.59 (dd,  $J = 6.7, 14.5$ Hz, 1H), 2.81-3.01 (m, 3H), 2.00 (dt,  $J = 6.0, 12.0$  Hz, 2H);  $^{13}C$  NMR (75 MHz,  $CDCl_3$ ):  $\delta$  147.2 (d,  $J = 4.7$  Hz), 138.9 (d,  $J = 5.5$  Hz), 137.1, 134.0 (d,  $J = 19.2$  Hz), 131.9 (d,  $J = 29.0$ Hz), 131.5 (d,  $J = 5.4$  Hz), 131.1, 129.6, 129.3 (d,  $J = 10.9$  Hz), 129.0 (d,  $J = 14.1$ Hz), 128.9, 128.8, 126.8 (d,  $J = 4.9$  Hz), 126.5, 44.1, 42.3 (d,  $J = 70.0$  Hz), 29.4 (d,  $J = 8.6$  Hz), 22.2;  $^{31}P$  NMR (122 MHz,  $CDCl_3$ ):  $\delta$  34.5. HRMS ( $M^+$ ):  $m/z$  (%), calcd for  $C_{28}H_{25}OP$  408.1643, found 408.1640( $M^+$ , 5.25).

#### 2-(Diphenylphosphoryl)-1,4-diphenylbutyl acetate (16a)

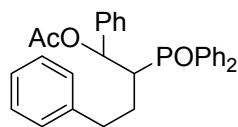

$^1H$  NMR (400 MHz,  $CDCl_3$ ):  $\delta$  7.85-7.90 (m, 2H), 7.66-7.79 (m, 3H), 7.37-7.49 (m, 5H), 7.19-7.39 (m, 5H), 7.05-7.08 (m, 3H), 6.54-6.57 (m, 2H), 6.27 (dd,  $J = 3.1, 9.0$  Hz, 1H), 2.93-3.00 (m, 1H), 2.04-2.12 (m, 4H), 1.93 (s, 3H);  $^{13}C$  NMR (100 MHz,  $CDCl_3$ ):  $\delta$  169.8, 141.4, 140.1 (d,  $J = 10.4$ Hz), 132.2, 131.7 (d,  $J = 8.4$ Hz), 131.5 (d,  $J = 8.7$ Hz), 129.3 (d,  $J = 2.6$  Hz), 129.1 (d,  $J = 2.8$  Hz), 129.0, 128.8 (d,  $J = 3.6$  Hz), 128.4 (d,  $J = 62.2$  Hz), 126.5, 126.3, 72.6, 44.7 (d,  $J = 67.3$  Hz), 35.5 (d,  $J = 7.2$  Hz), 26.1, 21.4. HRMS(ESI):  $m/z$ , calcd for  $C_{30}H_{30}O_3P$  469.1927, found 469.1928 ( $M+H^+$ ).

#### 1-(4-MethylPhenyl)-2-(diphenylphosphoryl)-1,2,3,4-tetrahydronaphthalene (15b)

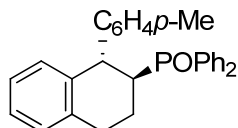

$^1\text{H}$  NMR (400 MHz,  $\text{CDCl}_3$ ):  $\delta$  7.78-7.82 (m, 2H), 7.58-7.62 (m, 2H), 7.42-7.48 (m, 3H), 7.36 (t,  $J = 7.3$  Hz, 1H), 7.22-7.26 (m, 2H), 7.04-7.07 (m, 2H), 6.96-6.99 (m, 1H), 6.78 (d,  $J = 7.6$  Hz, 2H), 6.76-6.77 (m, 1H), 6.72 (d,  $J = 7.9$  Hz, 2H), 4.60 (dd,  $J = 6.9, 14.0$  Hz, 1H), 2.85-3.05 (m, 3H), 2.19 (s, 3H), 2.00-2.07 (m, 2H);  $^{13}\text{C}$  NMR (75 MHz,  $\text{CDCl}_3$ ):  $\delta$  139.1 (d,  $J = 6.7$  Hz), 137.1, 136.2 (d,  $J = 1.6$  Hz), 132.0 (d,  $J = 4.1$  Hz), 131.6, 131.5, 131.4, 131.2, 131.0, 129.5, 129.1 (d,  $J = 12.0$  Hz), 128.7 (d,  $J = 6.7$  Hz), 126.6 (d,  $J = 33.1$  Hz), 43.9, 42.6 (d,  $J = 69.4$  Hz), 29.5 (d,  $J = 9.5$  Hz), 22.4, 21.5. HRMS ( $\text{M}^+$ ):  $m/z$  (%), calcd for  $\text{C}_{29}\text{H}_{27}\text{OP}$  422.1800, found 422.1804 ( $\text{M}^+$ , 6.83).

#### 2-(Diphenylphosphoryl)-4-phenyl-1-*p*-tolylbutyl acetate (16b)

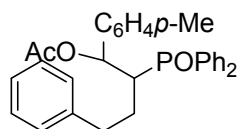

$^1\text{H}$  NMR (400 MHz,  $\text{CDCl}_3$ ):  $\delta$  7.78-7.83 (m, 2H), 7.69-7.74 (m, 2H), 7.39-7.49 (m, 7H), 7.15 (d,  $J = 8.1$  Hz, 2H), 7.11-7.13 (m, 2H), 7.06 (d,  $J = 8.0$  Hz, 2H), 6.65-6.67 (m, 2H), 6.32 (dd,  $J = 3.3, 8.7$  Hz, 1H), 2.77-2.81 (m, 1H), 2.34 (s, 3H), 2.10-2.23 (m, 4H), 1.96 (s, 3H);  $^{13}\text{C}$  NMR (75 MHz,  $\text{CDCl}_3$ ):  $\delta$  169.8, 141.6, 138.1, 132.2 (d,  $J = 2.7$  Hz), 132.0 (d,  $J = 2.7$  Hz), 131.7 (d,  $J = 8.5$  Hz), 131.5 (d,  $J = 8.8$  Hz), 129.7, 129.3 (d,  $J = 73.0$  Hz), 129.2 (d,  $J = 3.2$  Hz), 129.1 (d,  $J = 3.2$  Hz), 128.9 (d,  $J = 6.0$  Hz), 126.4 (d,  $J = 2.9$  Hz), 72.8, 44.7 (d,  $J = 67.5$  Hz), 35.5 (d,  $J = 7.2$  Hz), 26.4, 21.7, 21.5;  $^{31}\text{P}$  NMR (122 MHz,  $\text{CDCl}_3$ ):  $\delta$  33.6. HRMS ( $\text{M}^+$ ):  $m/z$  (%), calcd for  $\text{C}_{31}\text{H}_{31}\text{O}_3\text{P}$  482.2011, found 482.2010 ( $\text{M}^+$ , 4.9).

#### 1-(4-Chlorophenyl)-2-(diphenylphosphoryl)-1,2,3,4-tetrahydronaphthalene (15c)

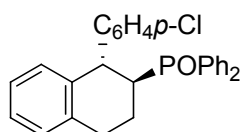

$^1\text{H}$  NMR (400 MHz,  $\text{CDCl}_3$ ):  $\delta$  7.79-7.83 (m, 2H), 7.53-7.58 (m, 2H), 7.36-7.46 (m, 4H), 7.22-7.27 (m, 2H), 6.96-7.08 (m, 3H), 6.89 (d,  $J = 8.3$  Hz, 2H), 6.78 (d,  $J = 8.3$  Hz, 2H), 6.70 (d,  $J = 7.7$  Hz, 1H), 4.66 (dd,  $J = 8.1, 13.5$  Hz, 1H), 2.86-3.01 (m, 3H), 1.98-2.04 (m, 2H);  $^{13}\text{C}$  NMR (75 MHz,  $\text{CDCl}_3$ ):  $\delta$  144.8 (d,  $J = 4.1$  Hz), 138.4 (d,  $J = 7.8$  Hz), 136.5, 133.5 (d,  $J = 12.3$  Hz), 132.3 (d,  $J = 11.5$  Hz), 131.7 (d,  $J = 2.4$  Hz), 131.1 (d,  $J = 2.6$  Hz), 131.0 (d,  $J = 1.8$  Hz), 130.8 (d,  $J = 2.2$  Hz), 130.8, 129.8 (d,  $J = 110.6$  Hz), 128.8 (d,  $J = 5.7$  Hz), 128.5 (d,  $J = 11.4$  Hz), 126.4 (d,  $J = 16.0$  Hz), 43.6, 42.3 (d,  $J = 71.2$  Hz), 29.3 (d,  $J = 10.9$  Hz), 22.5. HRMS ( $\text{M}^+$ ):  $m/z$  (%), calcd for  $\text{C}_{28}\text{H}_{24}\text{ClOP}$  442.1253, found 442.1250 ( $\text{M}^+$ , 3.87).

#### 1-(4-Chlorophenyl)-2-(diphenylphosphoryl)-4-phenylbutyl acetate (16c)

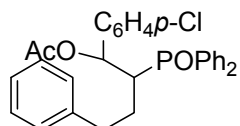

$^1\text{H}$  NMR (400 MHz,  $\text{CDCl}_3$ ):  $\delta$  7.78-7.84 (m, 2H), 7.62-7.72 (m, 2H), 7.30-7.54 (m, 8H), 7.14-7.18 (m, 5H), 6.63-6.70 (m, 2H), 6.26-6.43 (m, 1H), 2.74-2.84 (m, 1H), 2.64-2.80 (m, 2H), 2.04-2.12 (m, 2H), 1.96 (s, 3H);  $^{13}\text{C}$  NMR (75 MHz,  $\text{CDCl}_3$ ):  $\delta$  169.8, 141.2, 134.3, 132.6, 132.3 (d,  $J = 17.9$  Hz), 131.6 (d,  $J = 25.1$  Hz), 129.5, 129.3 (d,  $J = 29.6$  Hz), 129.0 (d,  $J = 15.1$  Hz), 128.8, 128.2, 126.6, 72.6, 35.2, 30.9 (d,  $J = 94.7$  Hz), 26.6, 21.4. HRMS(ESI):  $m/z$ , calcd for  $\text{C}_{30}\text{H}_{29}\text{ClO}_3\text{P}$  503.1537, found 503.1545 ( $\text{M}+\text{H}^+$ ).

### 1-Phenyl-1-methyl-2-(diphenylphosphoryl)-1,2,3,4-tetrahydronaphthalene (15d)

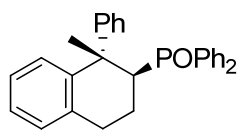

$^1\text{H}$  NMR (400 MHz,  $\text{CDCl}_3$ ):  $\delta$  7.55-7.70 (m, 4H), 7.39-7.48 (m, 4H), 7.25-7.34 (m, 5H), 7.14-7.18 (m, 2H), 6.96-7.01 (m, 2H), 6.72-6.80 (m, 2H), 3.46 (t,  $J = 8.6$  Hz, 1H), 2.82-2.85 (m, 1H), 2.53-2.57 (m, 1H), 2.14-2.33 (m, 2H), 1.26 (s, 3H);  $^{13}\text{C}$  NMR (75 MHz,  $\text{CDCl}_3$ ):  $\delta$  158.5 (d,  $J = 6.5$  Hz), 140.4, 132.2, 131.9, 131.5 (d,  $J = 9.1$  Hz), 131.3, 131.2, 131.1 (d,  $J = 8.5$  Hz), 130.9, 129.1 (d,  $J = 11.5$  Hz), 128.7 (d,  $J = 21$  Hz), 128.4, 127.8, 126.6, 48.2, 33.7 (d,  $J = 13.9$  Hz), 32.6, 29.9.

### 3-(Diphenylphosphoryl)-2,5-diphenylpentan-2-yl acetate (16d)

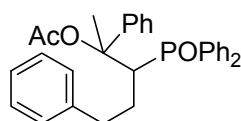

$^1\text{H}$  NMR (400 MHz,  $\text{CDCl}_3$ ):  $\delta$  7.85-7.89 (m, 2H), 7.48-7.52 (m, 6H), 7.23-7.33 (m, 4H), 7.07-7.16 (m, 6H), 6.60 (d,  $J = 6.5$  Hz, 2H), 2.85 (d,  $J = 11.0$  Hz, 1H), 2.33 (s, 3H), 1.96-2.17 (m, 4H), 1.80 (s, 3H);  $^{13}\text{C}$  NMR (75 MHz,  $\text{CDCl}_3$ ):  $\delta$  168.9, 141.4, 131.8 (d,  $J = 7.5$  Hz), 131.0 (d,  $J = 4.7$  Hz), 130.7, 128.6, 128.5, 128.4, 128.3, 128.2, 127.0 (d,  $J = 150.4$  Hz), 125.9, 69.5, 37.6, 29.1, 22.2, 21.7.

### 1-Phenyl-2-(diphenylphosphoryl)-3-methyl-7-*tert*-butyl-1,2,3,4-tetrahydronaphthalene (15f)

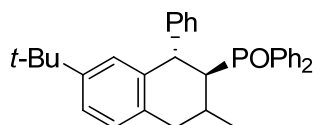

$^1\text{H}$  NMR (400 MHz,  $\text{CDCl}_3$ ):  $\delta$  7.84-7.88 (m, 2H), 7.44-7.46 (m, 5H), 7.11-7.20 (m, 4H), 6.84-7.02 (m, 6H), 6.70 (s, 1H), 4.71 (t,  $J = 10.6$  Hz, 1H), 3.03-3.11 (m, 2H), 2.71-2.75 (m, 1H), 2.33-2.35 (m, 1H), 1.10 (s, 9H), 1.08 (d,  $J = 7.4$  Hz, 3H);  $^{13}\text{C}$  NMR (75 MHz,  $\text{CDCl}_3$ ):  $\delta$  148.8, 145.6, 134.3 (d,  $J = 96.1$  Hz), 132.1, 131.3 (d,  $J = 2.3$  Hz), 130.9 (d,  $J = 8.4$  Hz), 130.5 (d,  $J = 8.4$  Hz), 129.9, 128.7 (d,  $J = 11.3$  Hz), 128.4 (d,  $J = 88.9$  Hz), 128.1, 127.7 (d,  $J = 52.6$  Hz), 126.9 (d,  $J = 109.4$  Hz), 123.2, 46.1 (d,  $J = 70.4$  Hz), 42.7, 37.6 (d,  $J = 11.5$  Hz), 34.4, 31.4, 28.5, 16.5. HRMS ( $\text{M}^+$ ):  $m/z$  (%), calcd for  $\text{C}_{33}\text{H}_{35}\text{OP}$  478.2426, found 478.2423 ( $\text{M}^+$ , 7.65).

### 4-(4-*tert*-Butylphenyl)-2-(diphenylphosphoryl)-3-methyl-1-phenylbutyl acetate (16f)

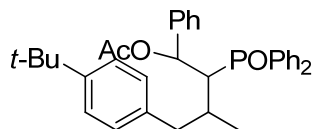

$^1\text{H}$  NMR (300 MHz,  $\text{CDCl}_3$ ):  $\delta$  7.36-7.49 (m, 8H), 7.10-7.22 (m, 5H), 6.92-7.07 (m, 6H), 6.37 (dd,  $J = 5.8, 9.2$  Hz, 1H), 3.04 (t,  $J = 9.7$  Hz, 1H), 2.90 (dd,  $J_1 = 9.4, 12.9$  Hz, 1H), 2.62 (dd,  $J_1 = 6.7, 13.2$  Hz, 1H), 2.24-2.30 (m, 1H), 2.11 (s, 3H), 1.40 (s, 9H), 1.20 (d,  $J = 7.0$  Hz, 3H);  $^{13}\text{C}$  NMR (100 MHz,  $\text{CDCl}_3$ ):  $\delta$  169.7, 149.9, 139.2, 138.5, 131.9, 131.4 (d,  $J = 8.2$  Hz), 131.0, 130.7 (d,  $J = 8.3$  Hz), 130.2, 129.1 (d,  $J = 11.3$  Hz), 128.6 (d,  $J = 19.7$  Hz), 128.5, 125.9, 75.3 (d,  $J = 5.2$  Hz), 44.6 (d,  $J = 68.2$  Hz), 43.7 (d,  $J = 12.0$  Hz), 35.7, 32.2, 31.7, 22.3, 17.9. HRMS (ESI):  $m/z$ , calcd for  $\text{C}_{35}\text{H}_{39}\text{O}_3\text{P}$  538.2637, found  $\text{C}_{35}\text{H}_{40}\text{O}_3\text{P}$  539.2717 ( $\text{M}+\text{H}^+$ ).

**1-Phenyl-2-(diphenylphosphoryl)-4-methyl-1,2,3,4-tetrahydronaphthalene (15g)**

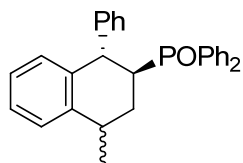

$^1\text{H}$  NMR (300 MHz,  $\text{CDCl}_3$ ):  $\delta$  7.77-7.81 (m, 2H), 7.44-7.61 (m, 5H), 7.08-7.30 (m, 5H), 6.69-6.96 (m, 7H), 4.76 (dd,  $J = 9.6, 14.9$  Hz, 0.6H), 4.63 (dd,  $J = 7.7, 13.3$  Hz, 0.4H), 3.13-3.16 (m, 2H), 1.79-1.90 (m, 2H), 1.42 (d,  $J = 6.9$  Hz, 1.2H), 1.33 (d,  $J = 6.5$  Hz, 1.8H);  $^{13}\text{C}$  NMR (100 MHz,  $\text{CDCl}_3$ ):  $\delta$  146.7, 146.4 (d,  $J = 4.5$  Hz), 141.8, 141.3, 140.0 (d,  $J = 9.5$  Hz), 138.3 (d,  $J = 7.7$  Hz), 134.1 (d,  $J = 12.6$  Hz), 133.7 (d,  $J = 33.6$  Hz), 133.1 (d,  $J = 12.8$  Hz), 132.7 (d,  $J = 33.8$  Hz), 131.9, 131.3, 131.2, 131.1, 131.0, 130.9, 129.8, 129.6, 129.2 (d,  $J = 3.8$  Hz), 129.1 (d,  $J = 3.9$  Hz), 128.7, 128.6, 128.3 (d,  $J = 27.9$  Hz), 126.6 (d,  $J = 8.8$  Hz), 126.5, 126.4, 125.7, 44.7 (d,  $J = 81.0$  Hz), 42.3 (d,  $J = 71.5$  Hz), 38.5, 37.8, 33.6 (d,  $J = 13.4$  Hz), 33.0, 31.9 (d,  $J = 9.1$  Hz), 29.2, 23.4, 21.0. HRMS (ESI):  $m/z$ , calcd for  $\text{C}_{29}\text{H}_{27}\text{OP}$  422.1800, found 423.1872 ( $\text{M}+\text{H}^+$ ). HPLC: 55:45.



### NMR Spectra

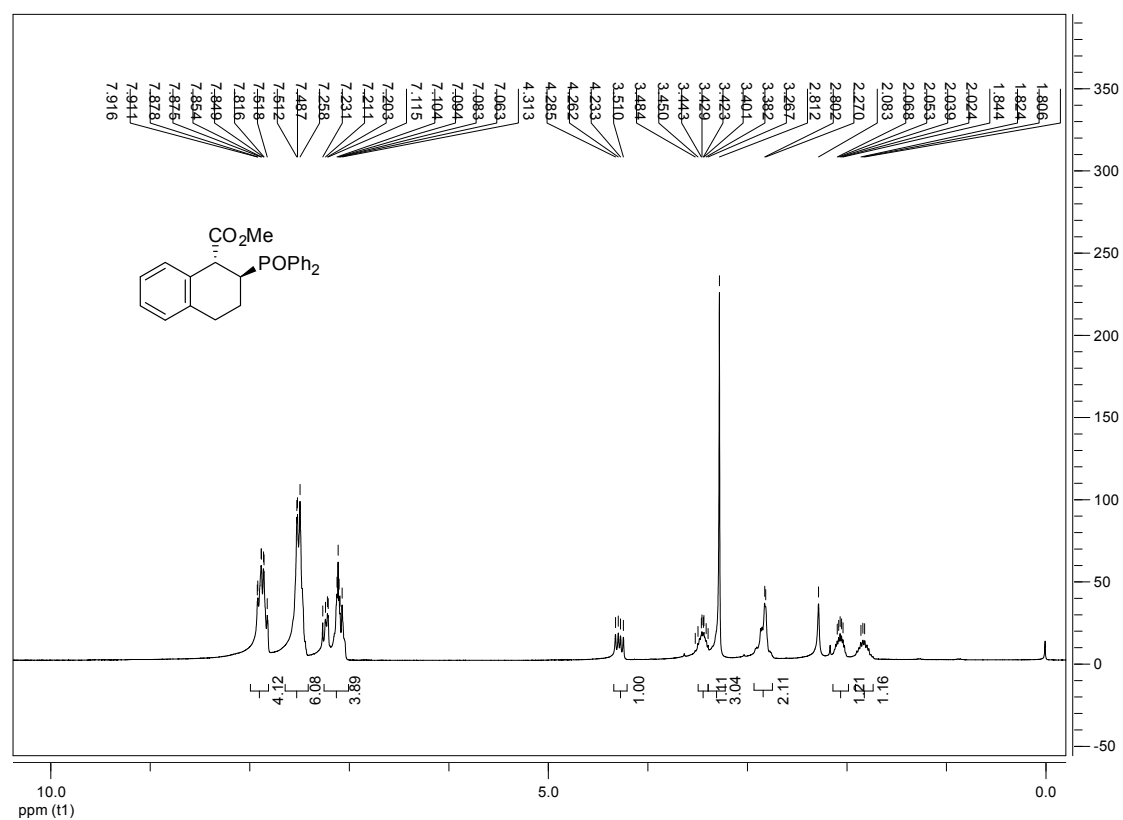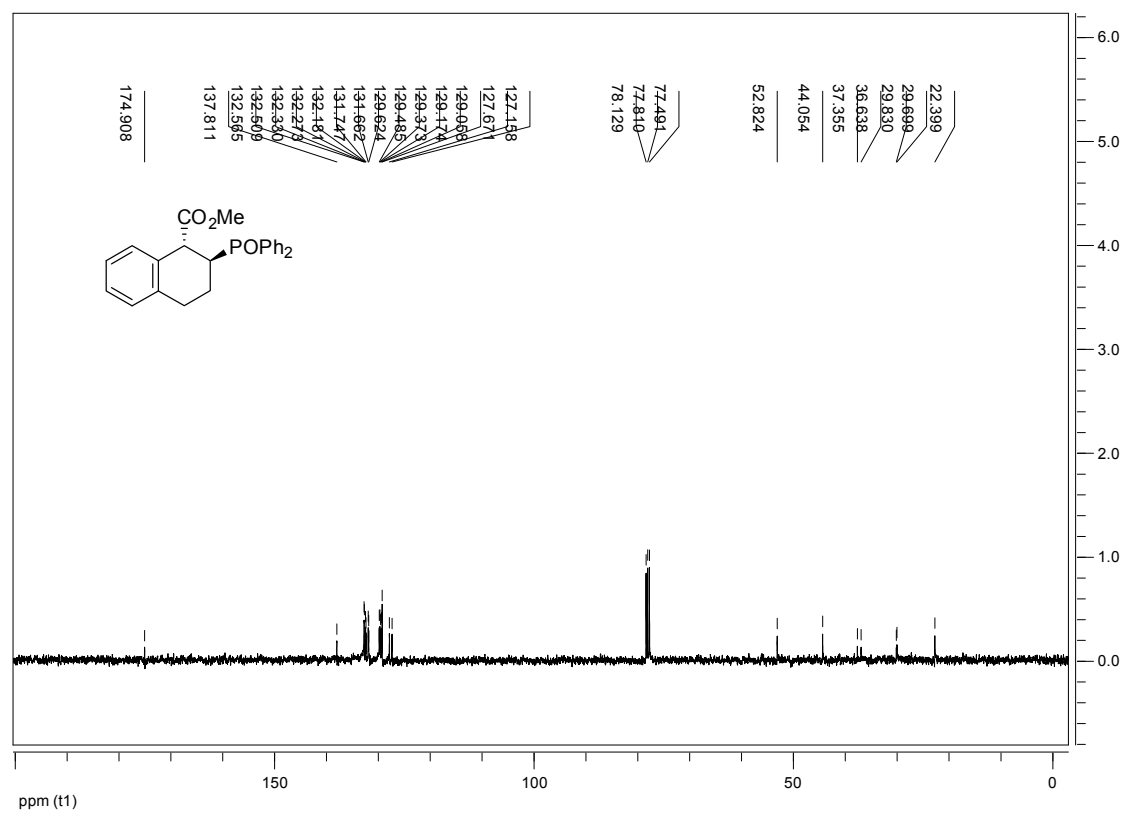

<sup>31</sup>P NMR for 8a

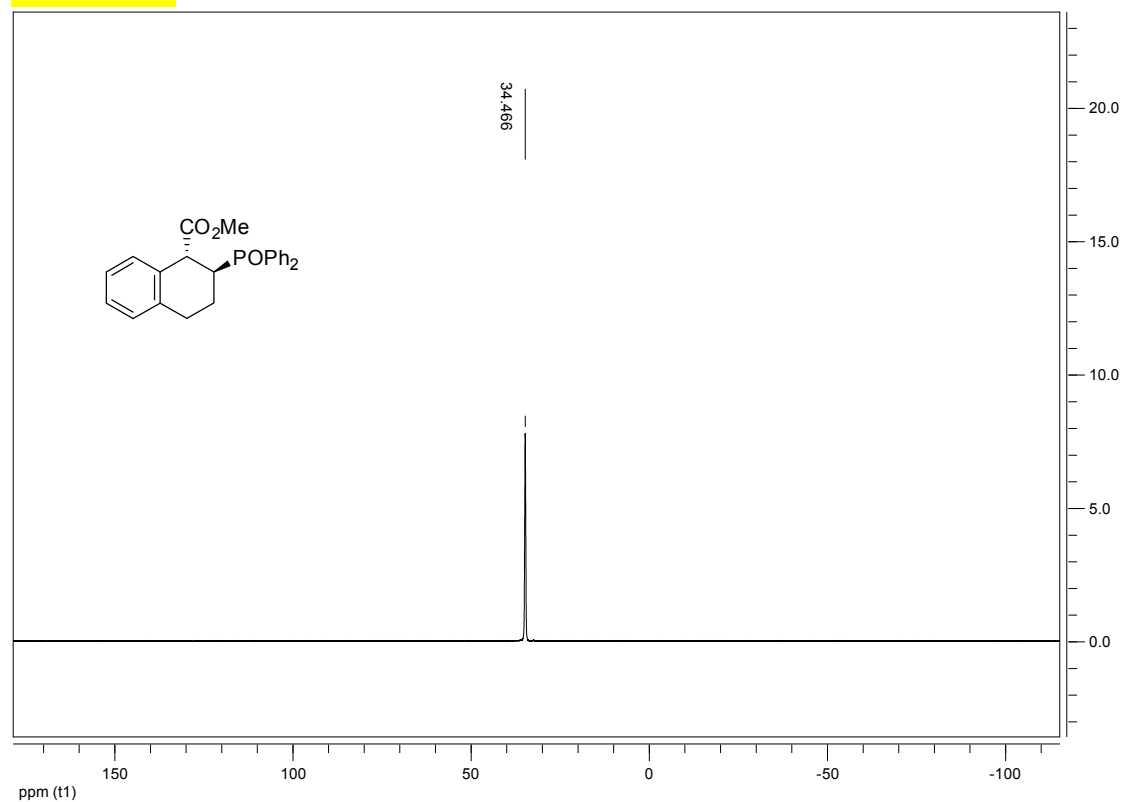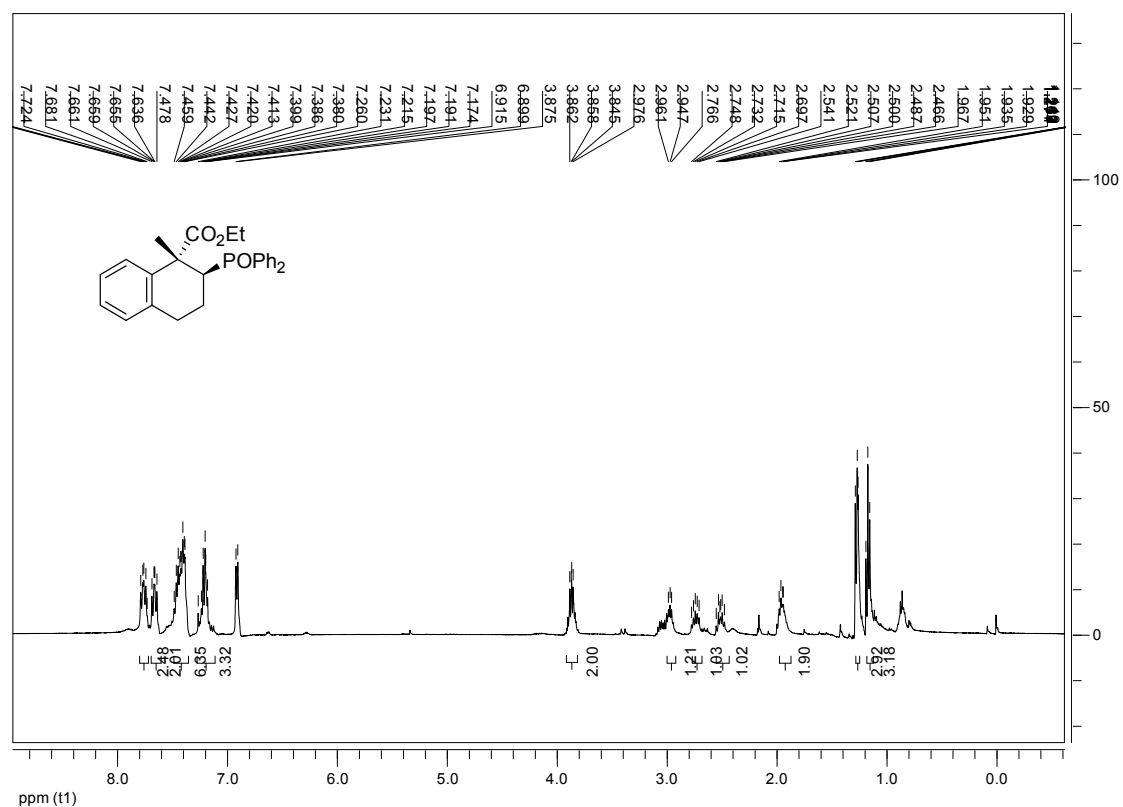

<sup>13</sup>C NMR for 8b

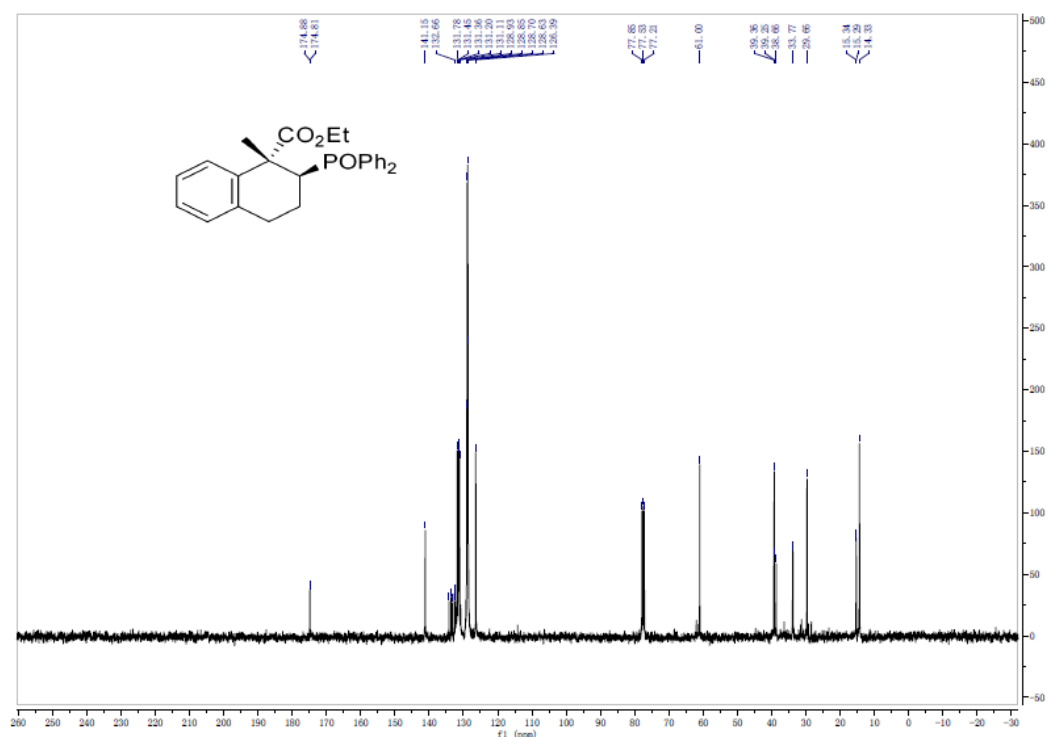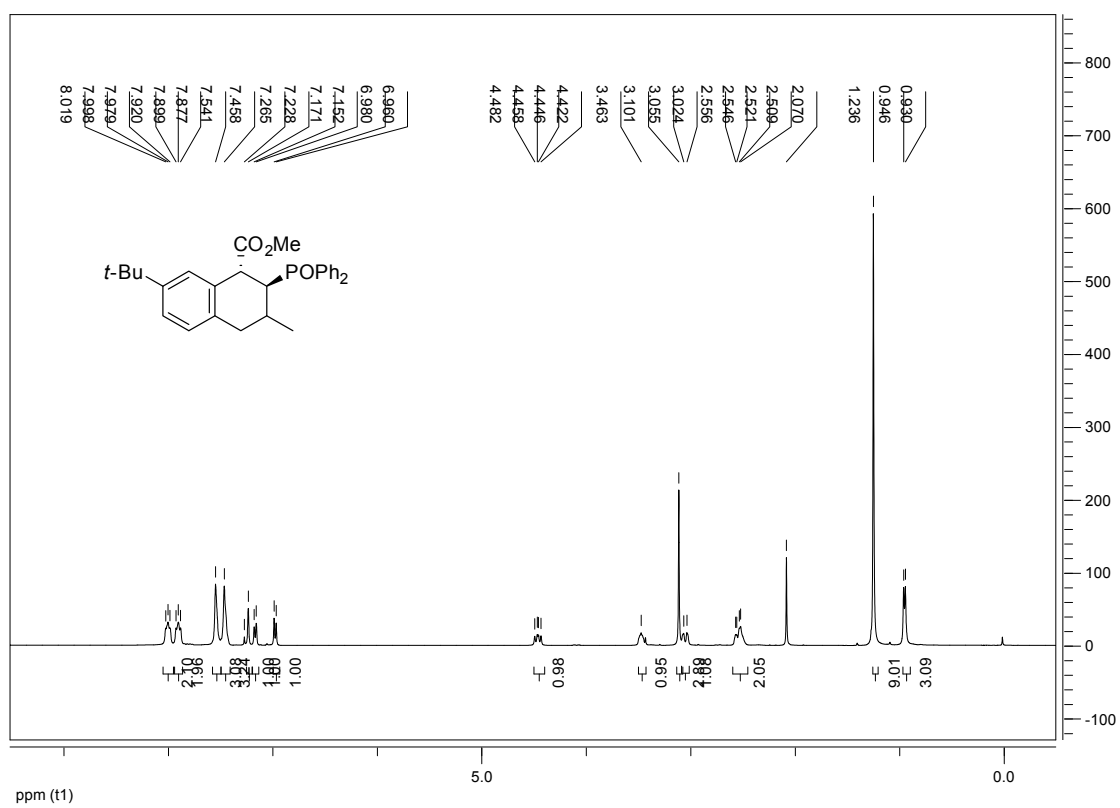

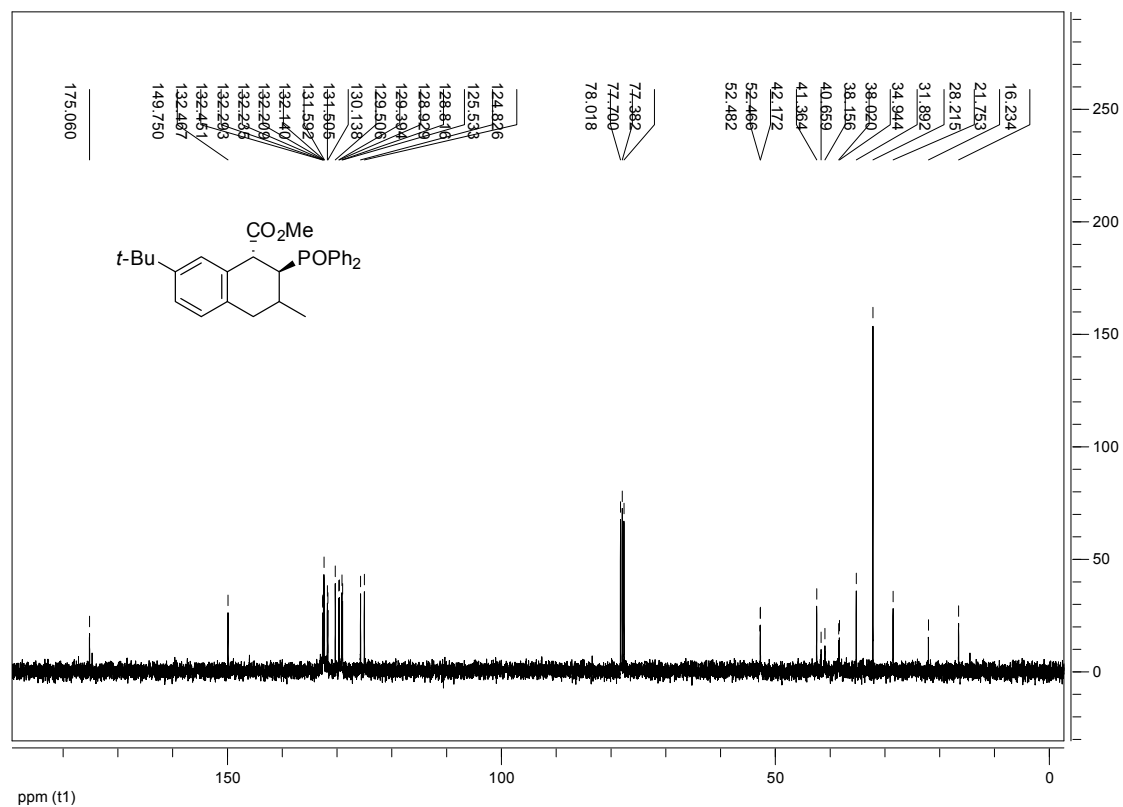

<sup>31</sup>P NMR for 8d

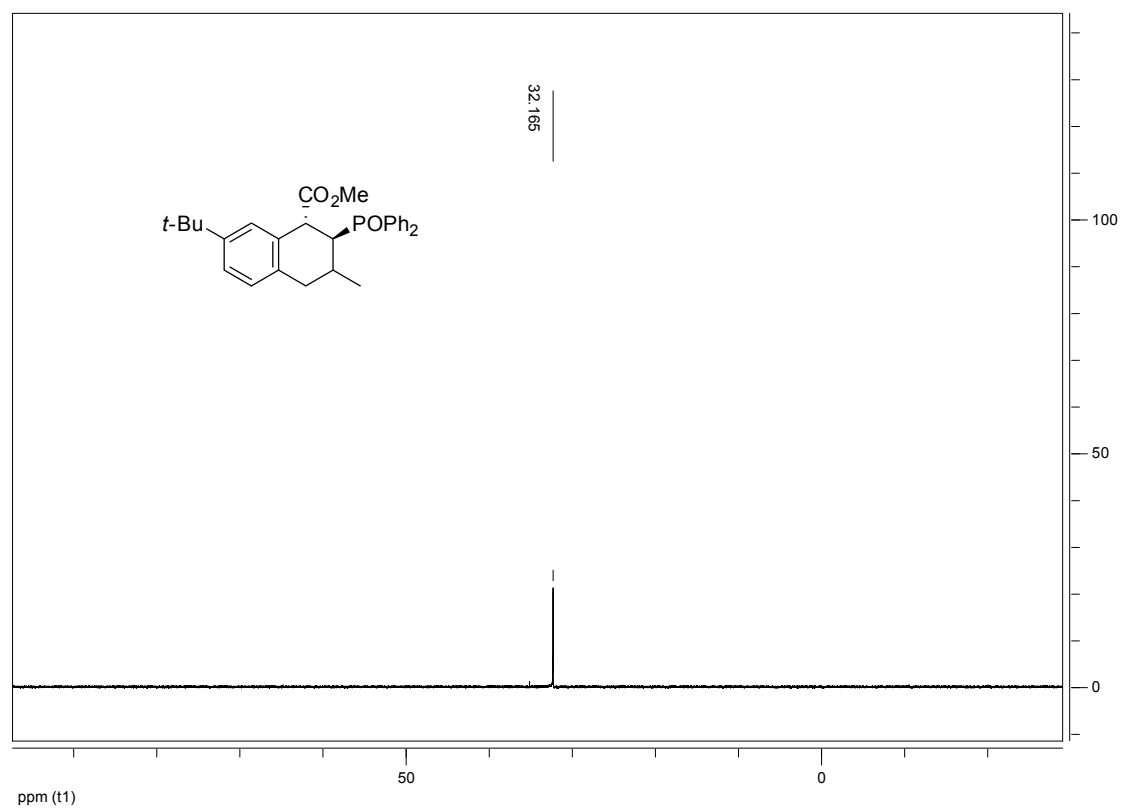

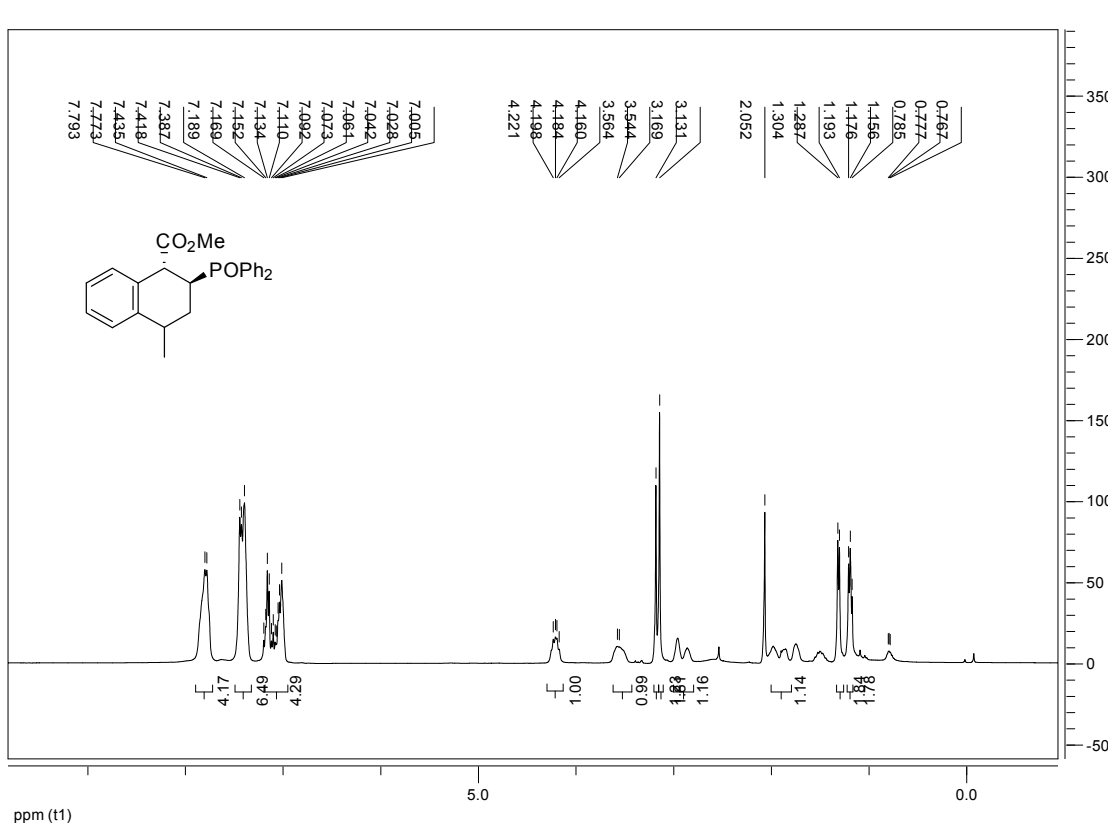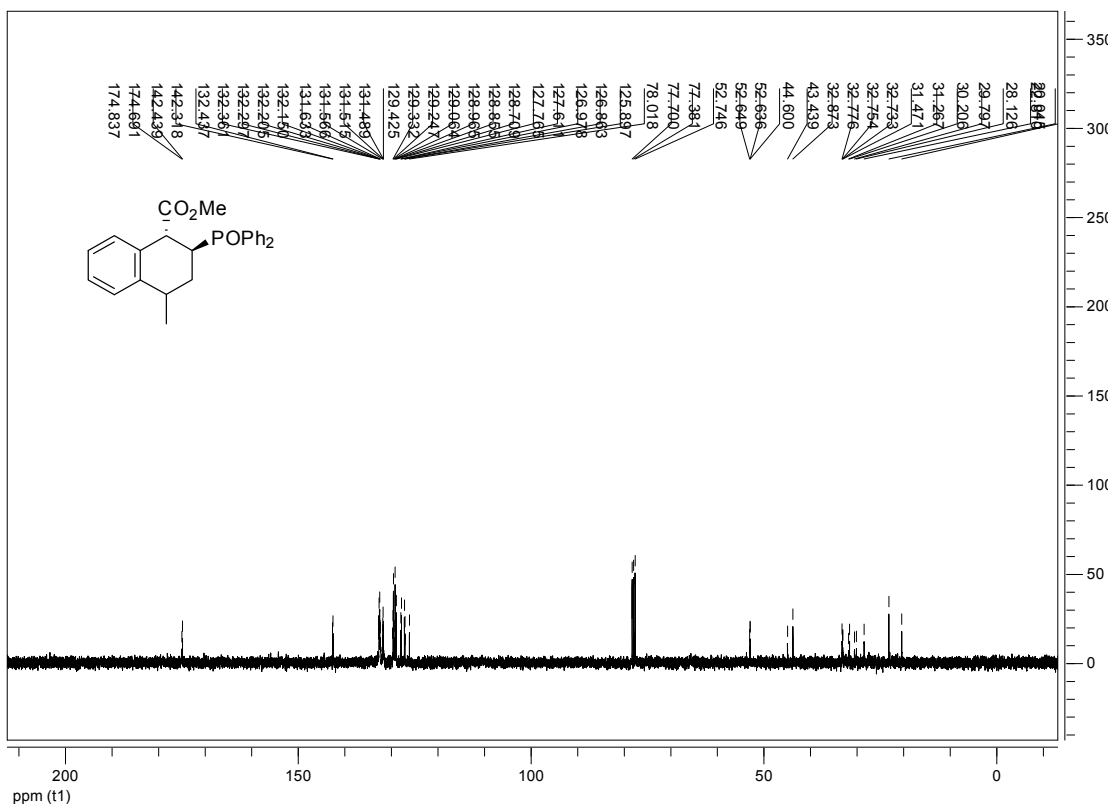

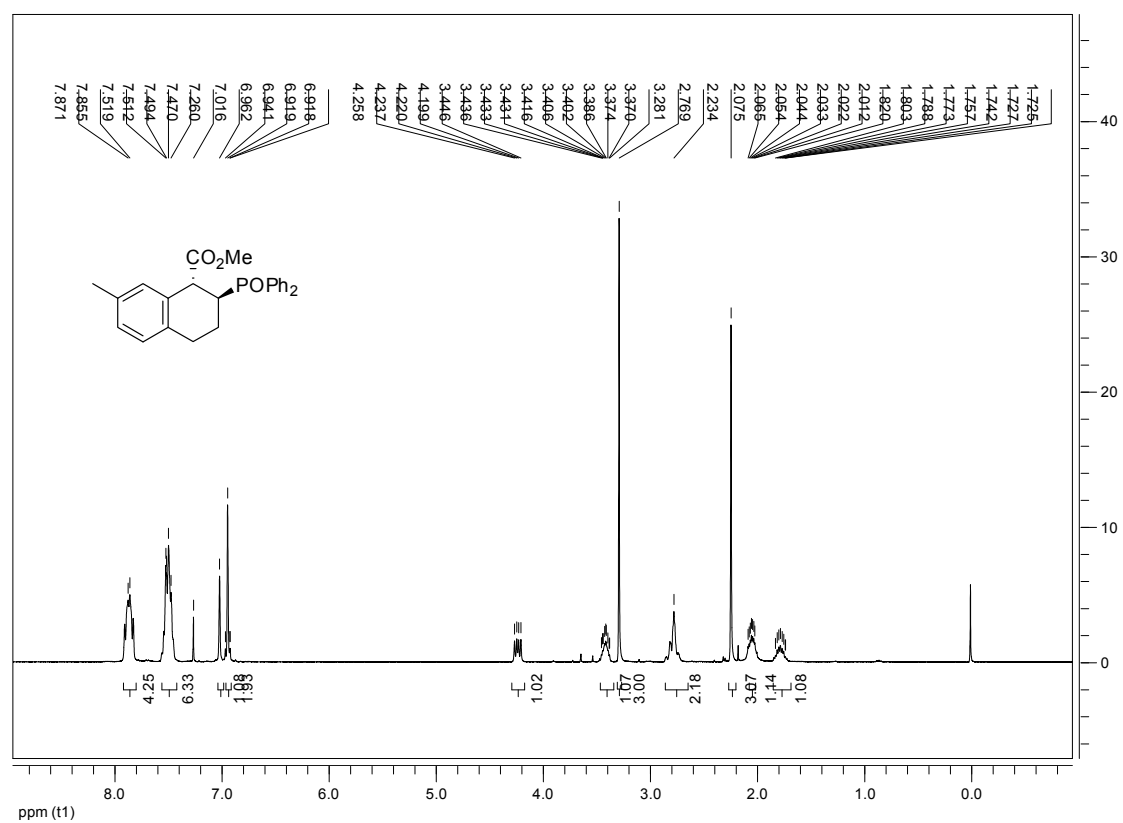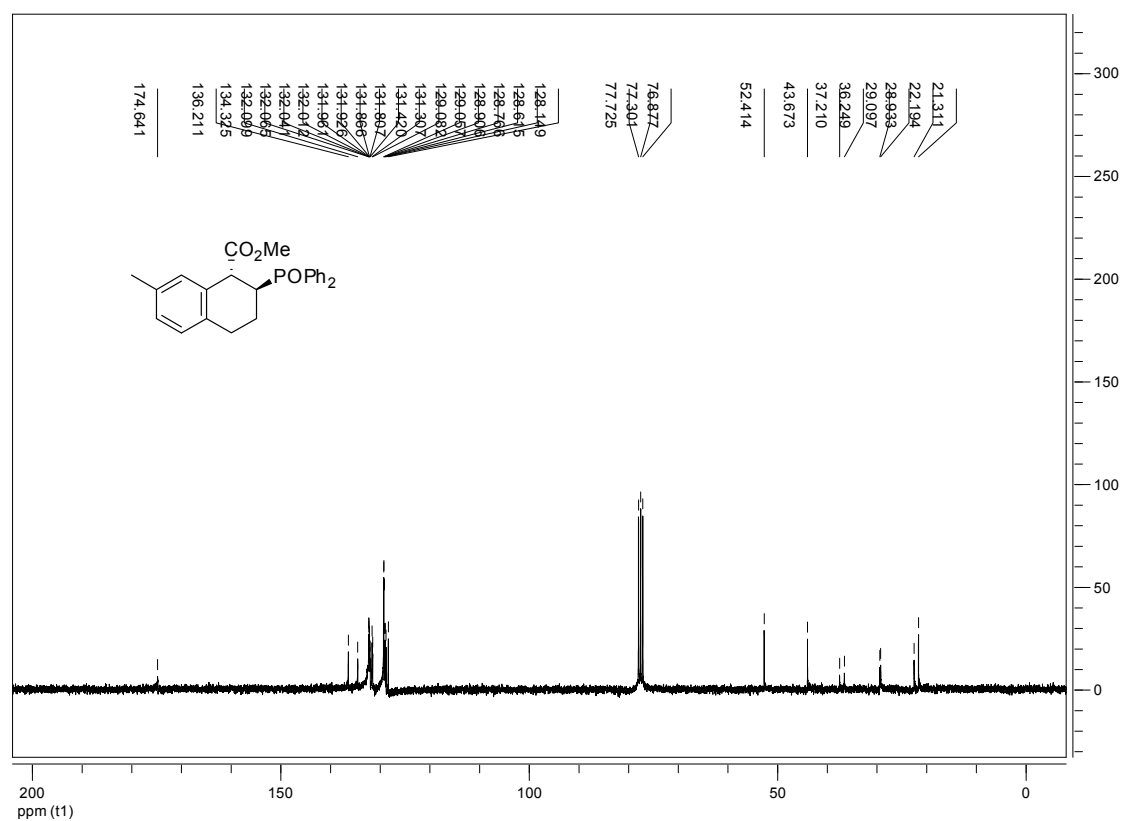

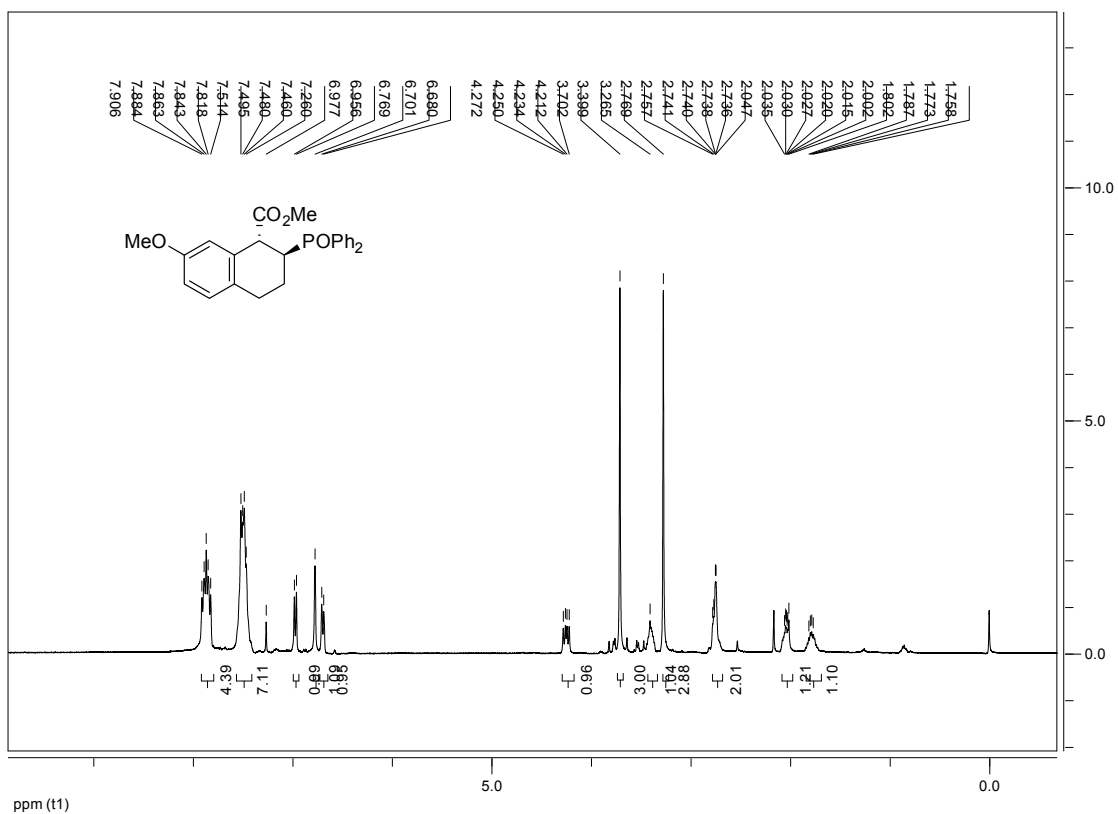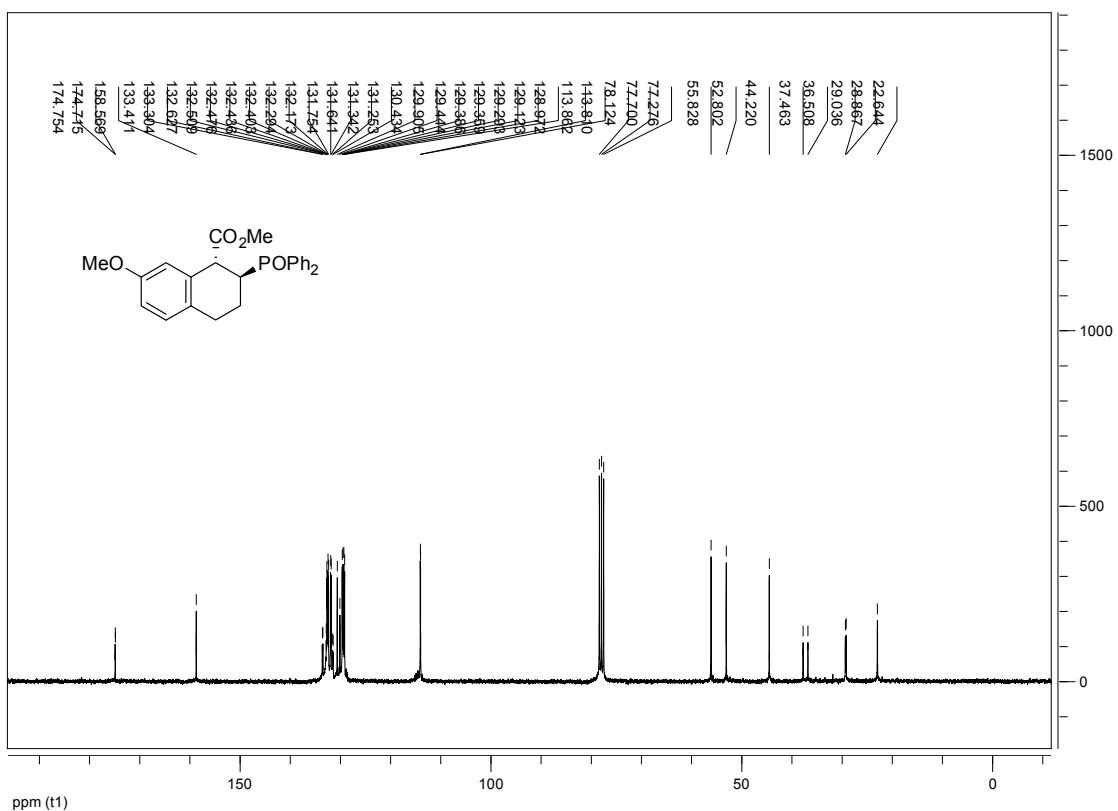

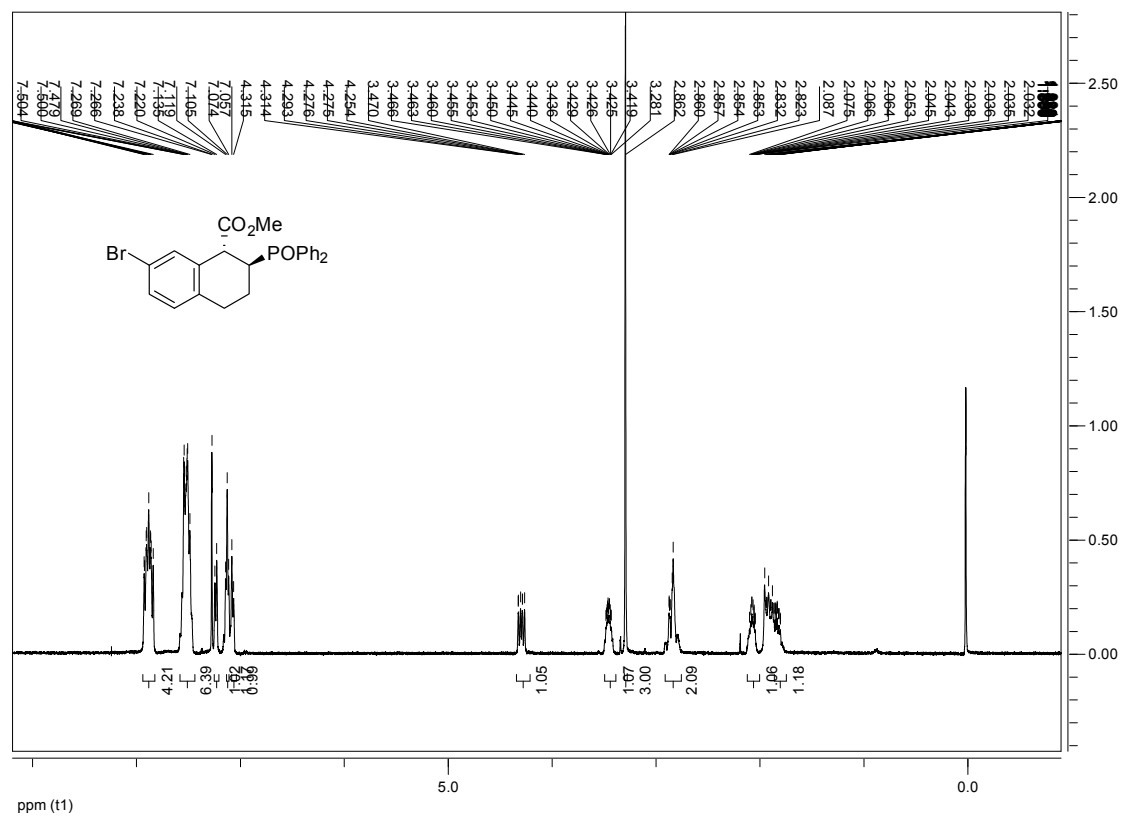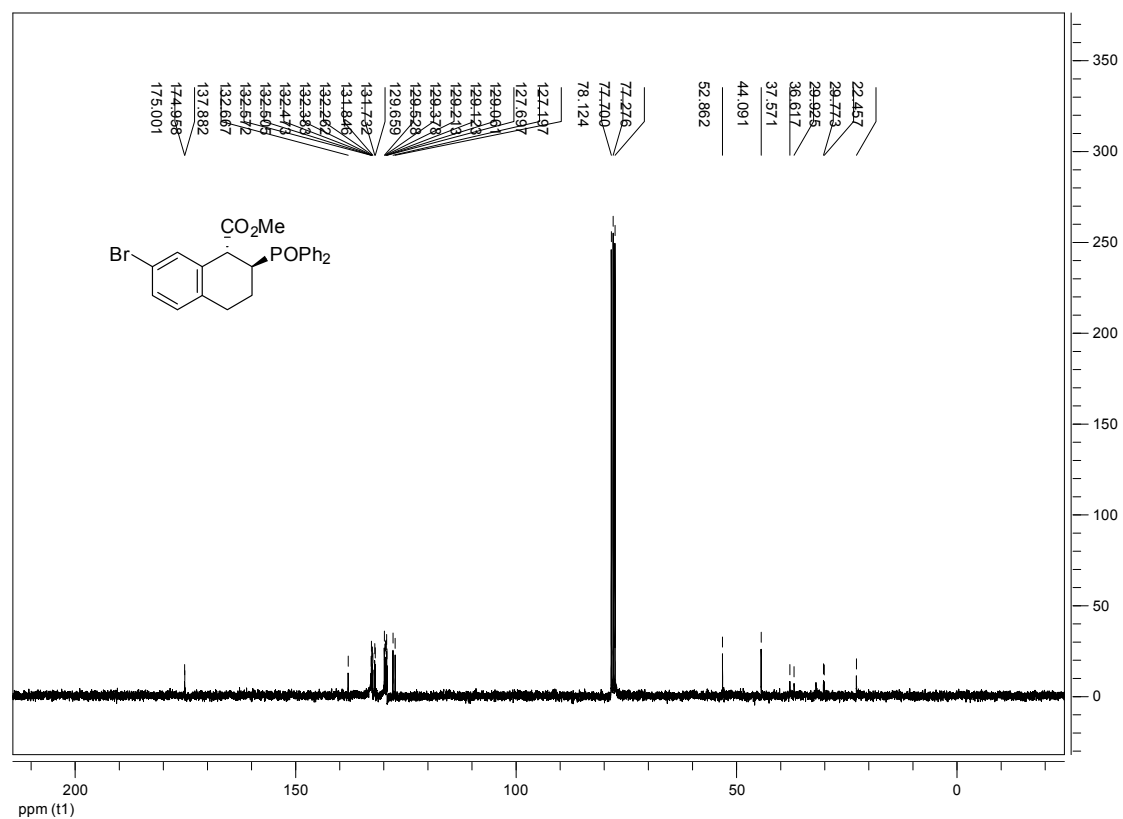





<sup>31</sup>P-decoupled proton NMR for 15a

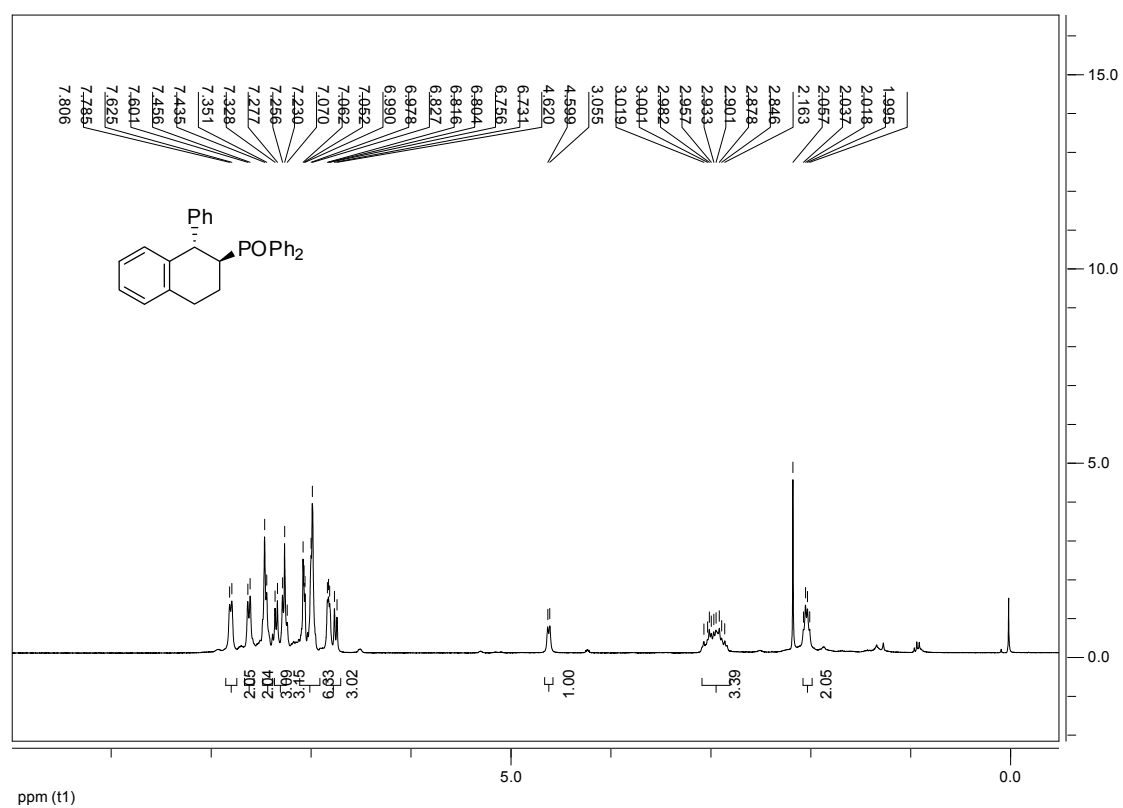

<sup>31</sup>P NMR for 15a

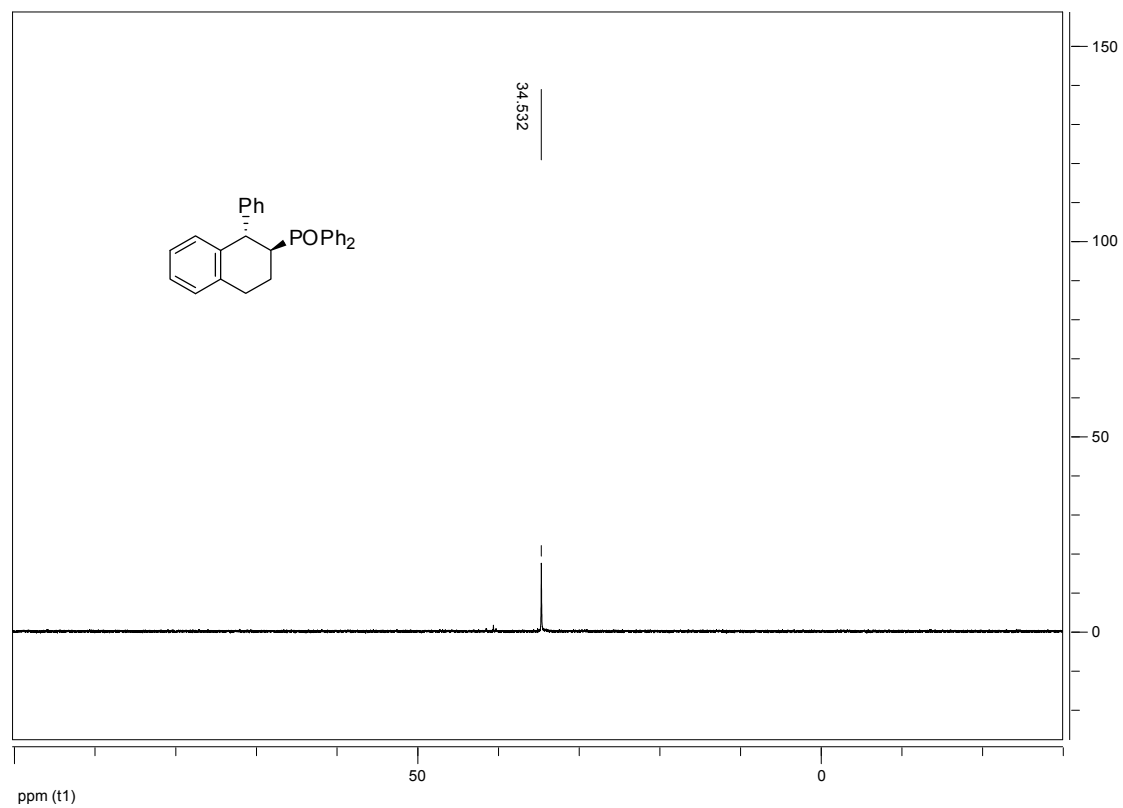



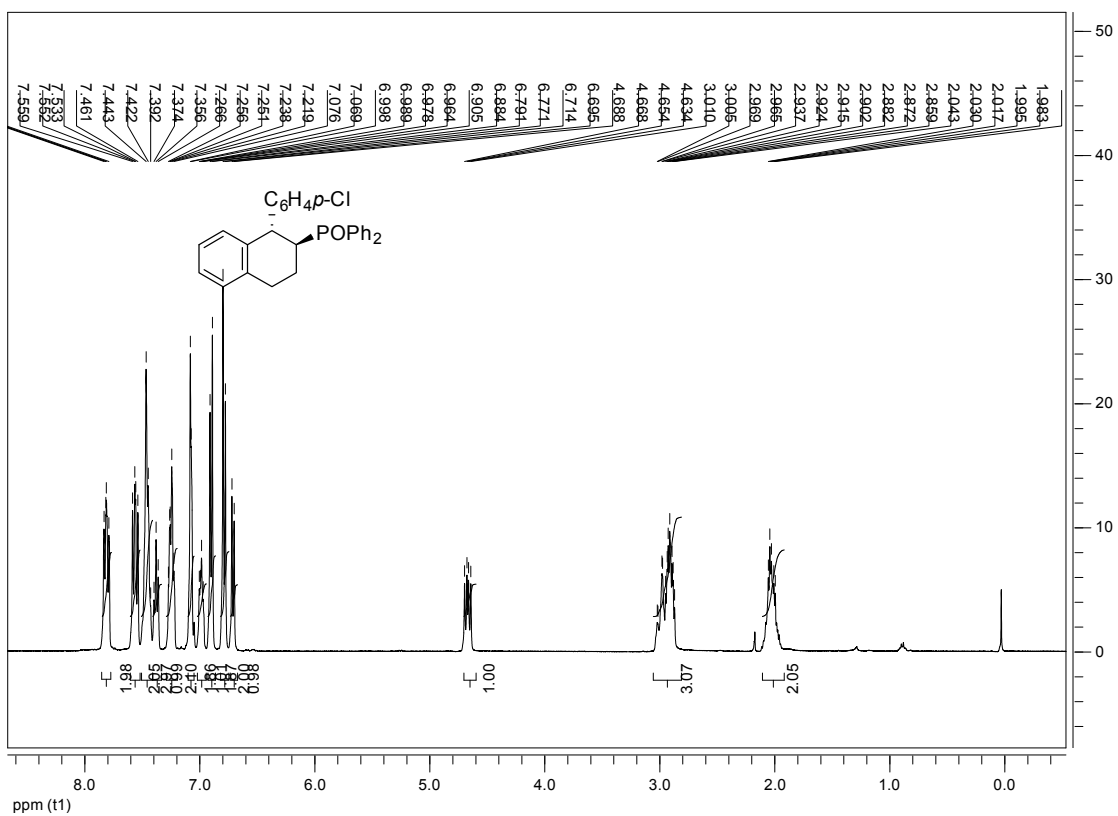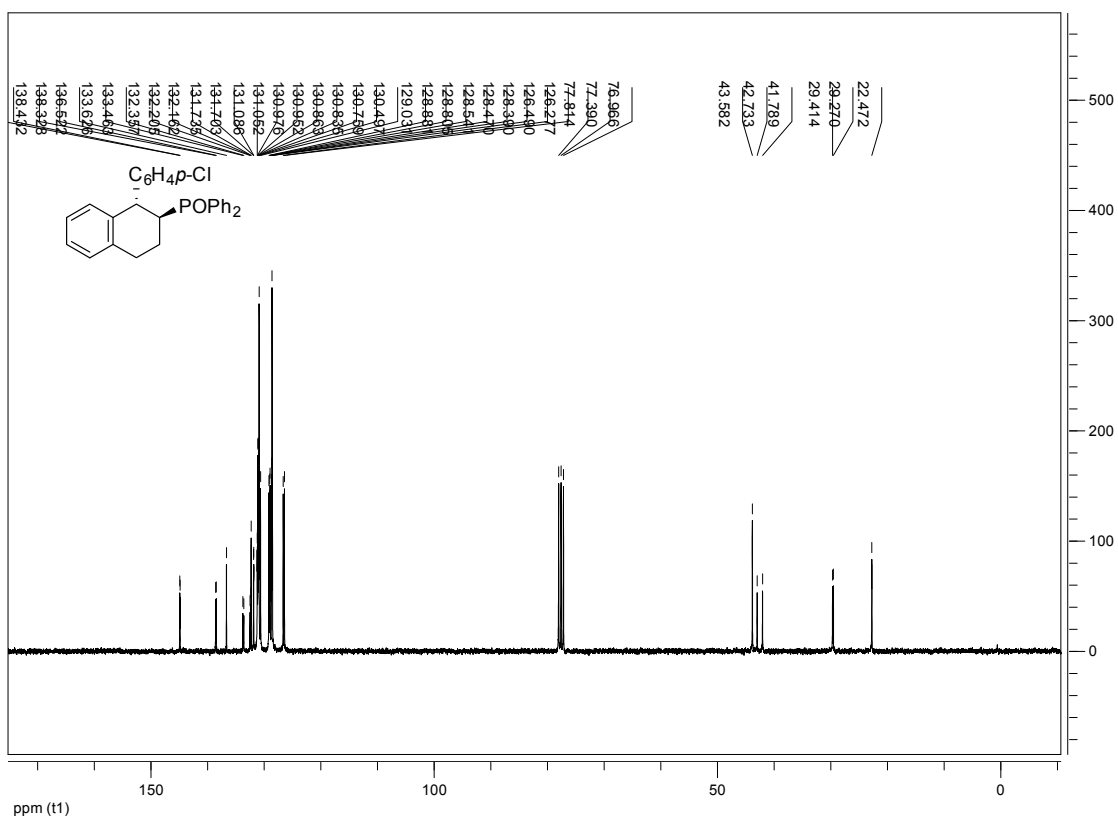



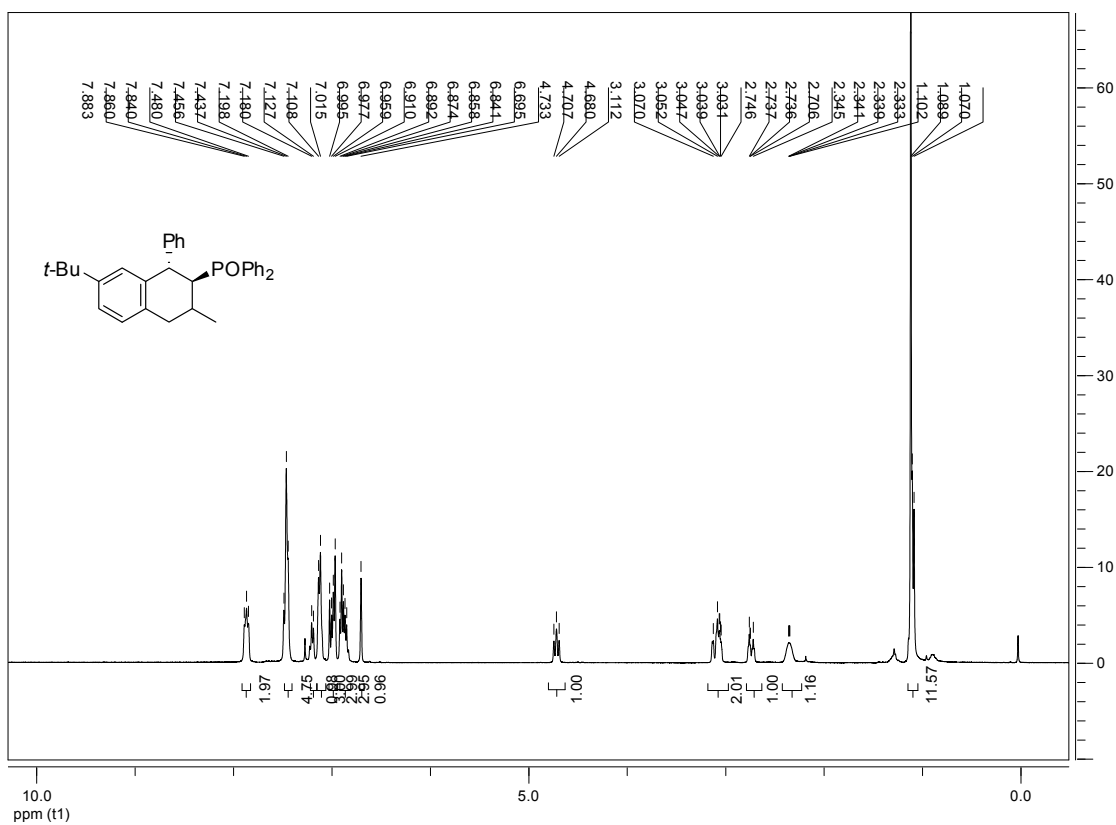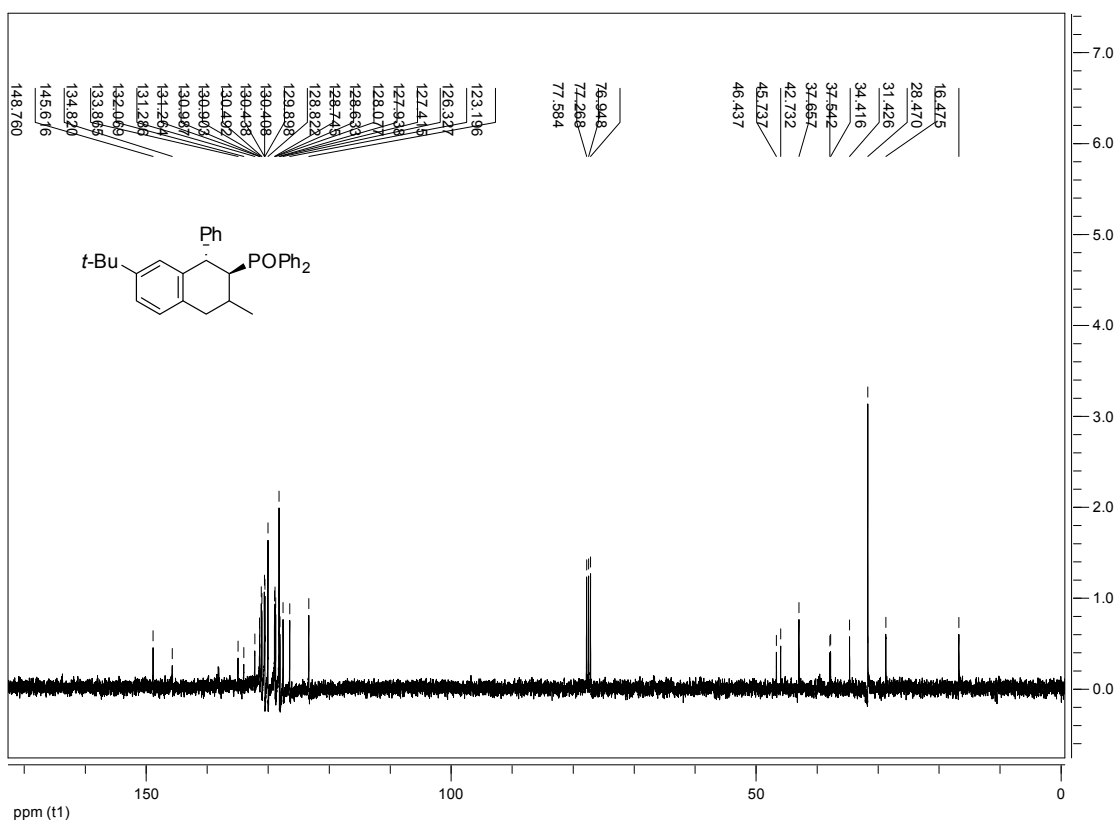







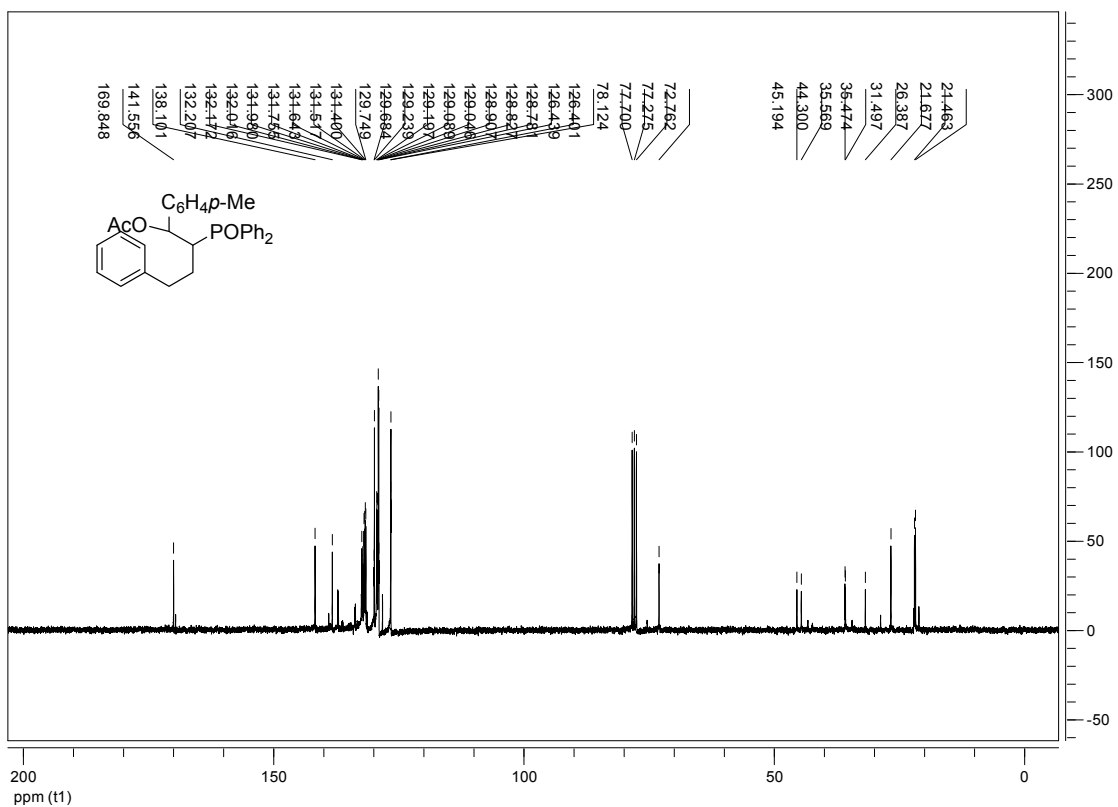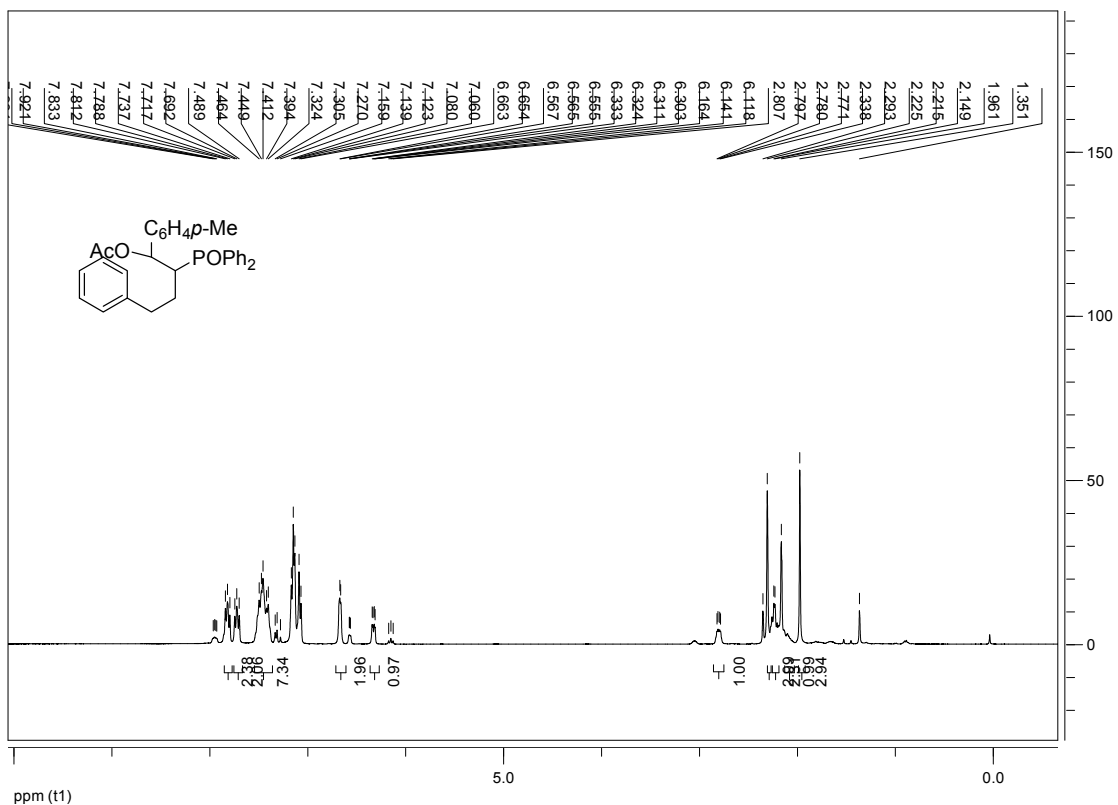

<sup>31</sup>P NMR for 16b

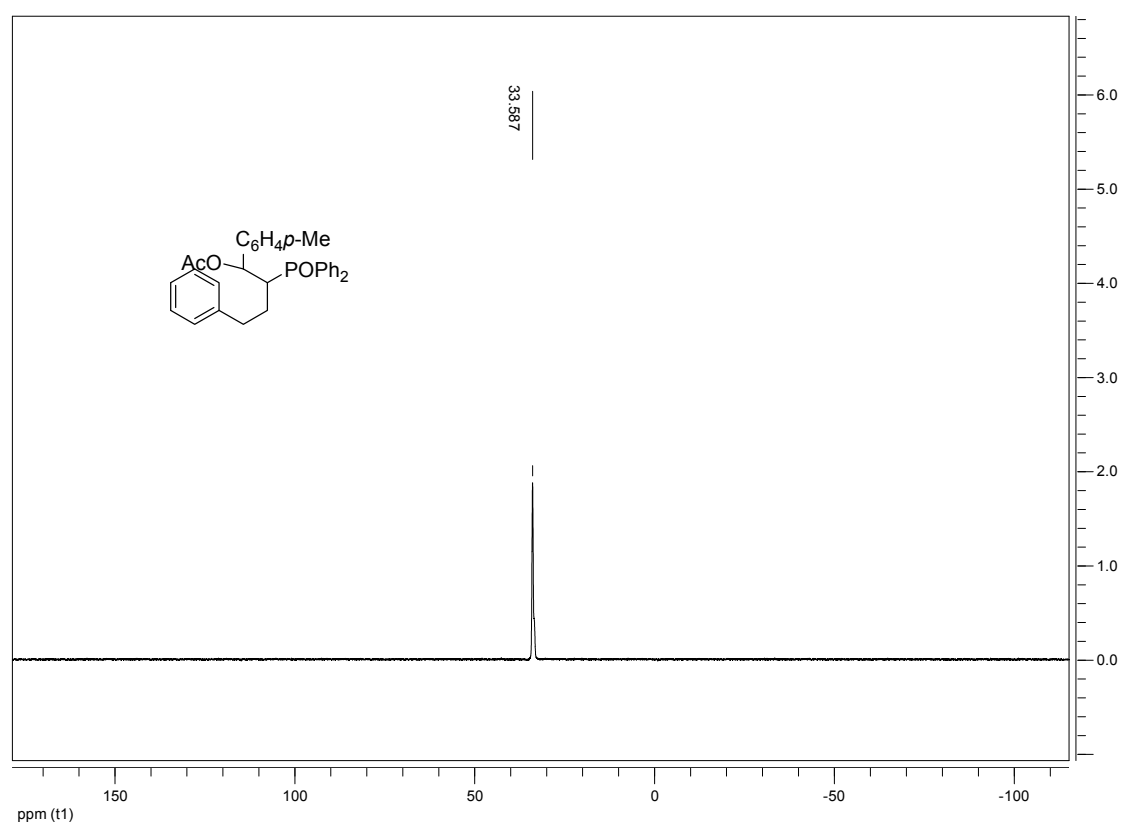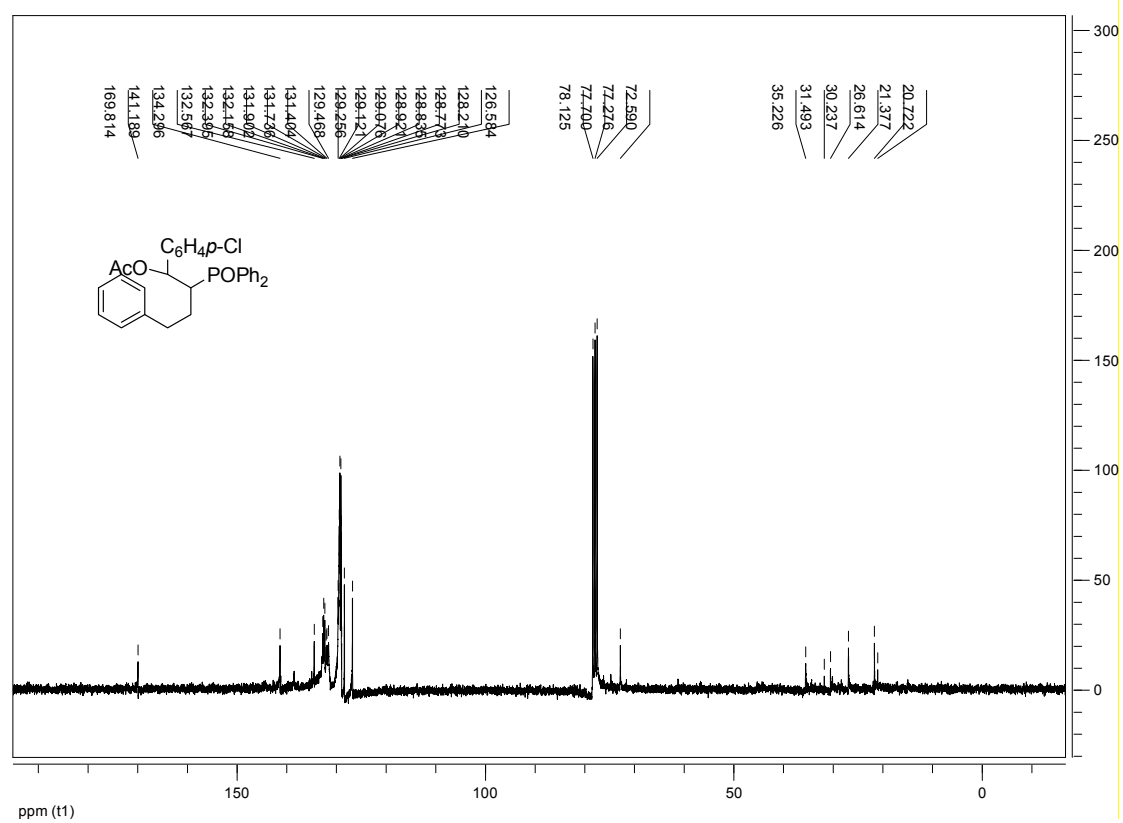

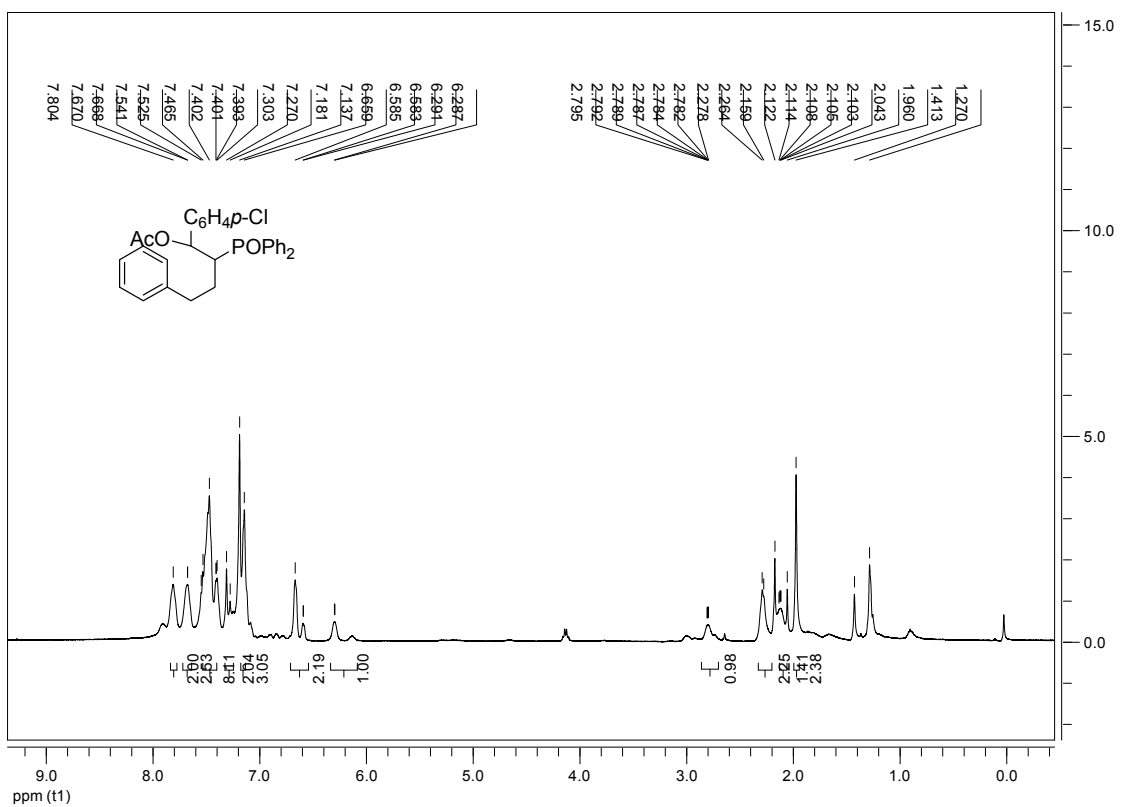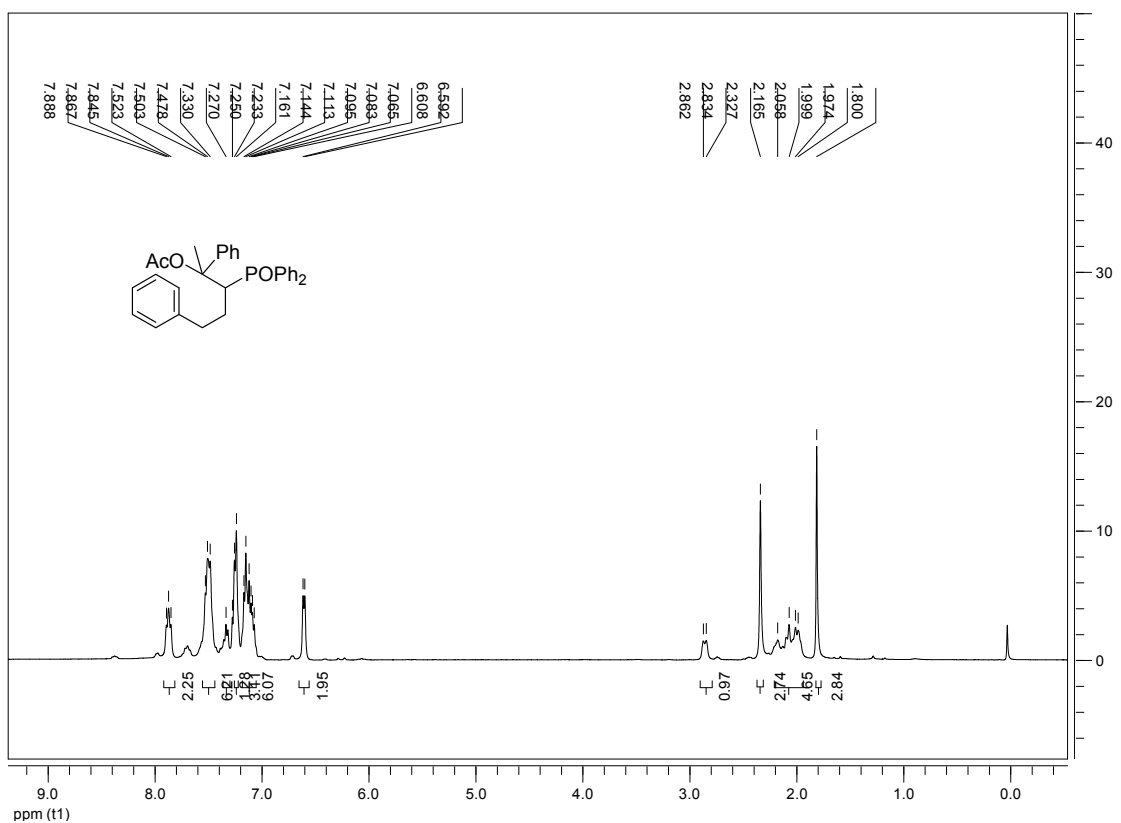

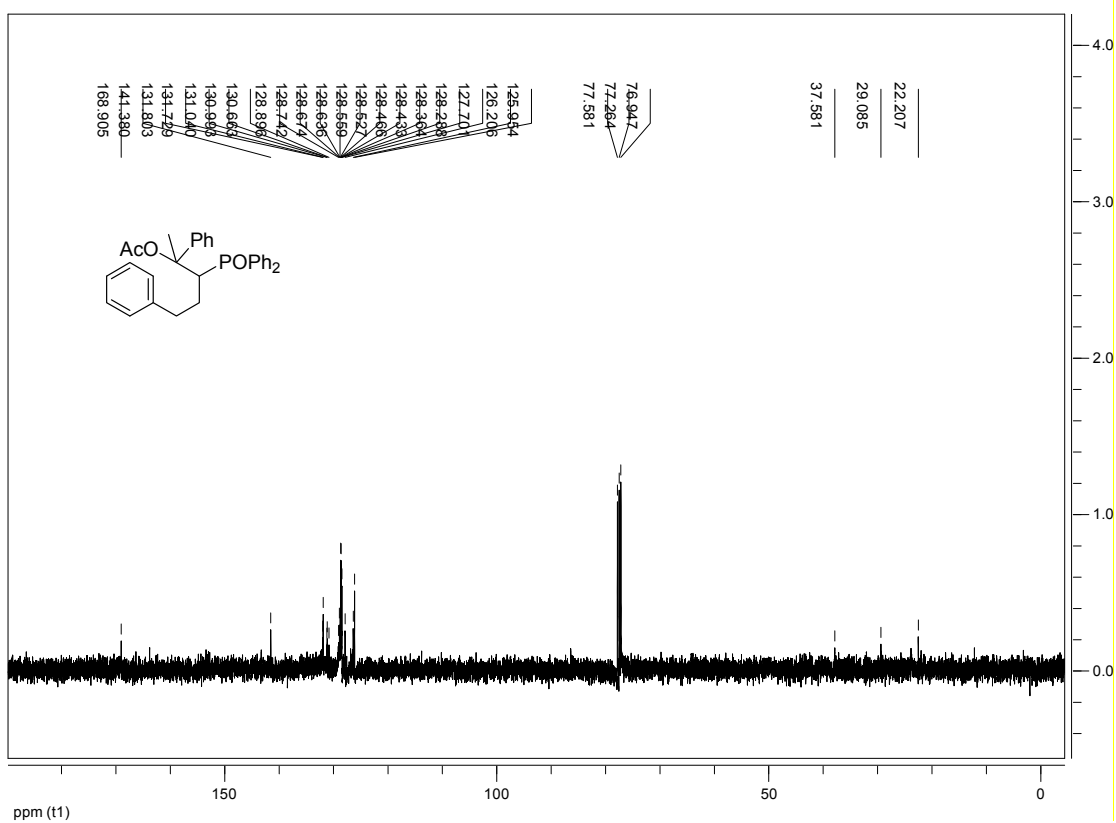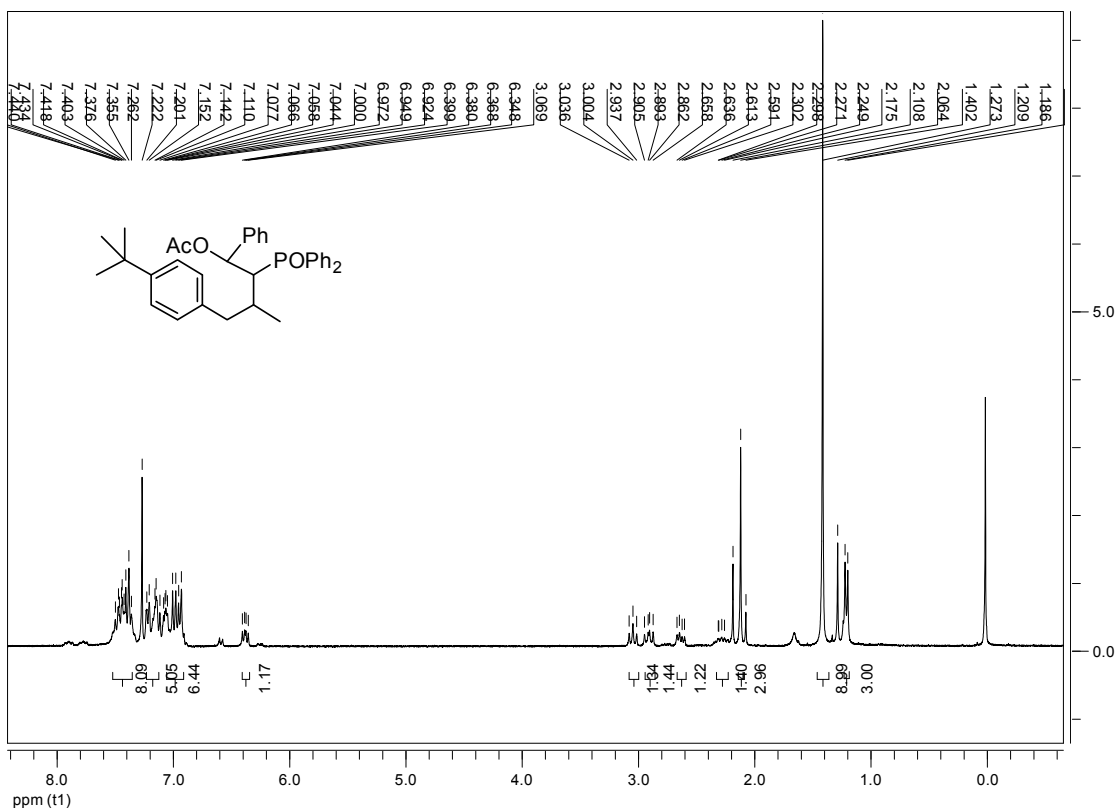

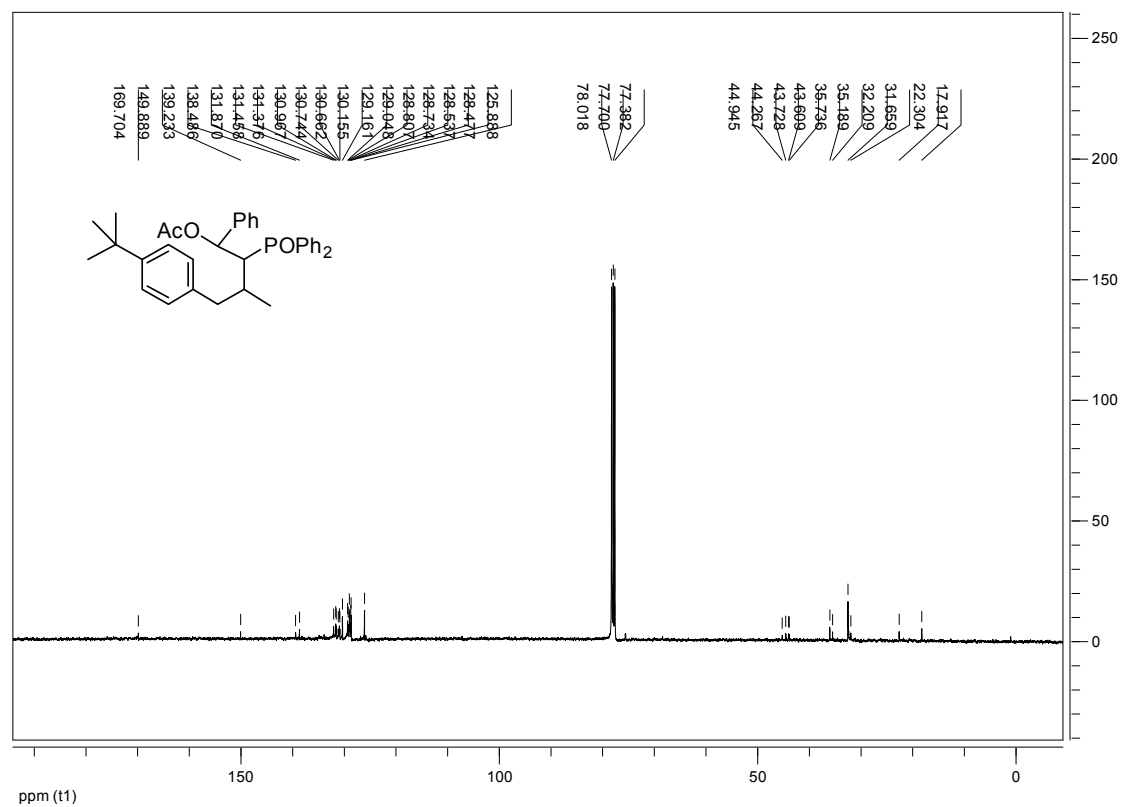

## X-ray crystal structures

### 8a

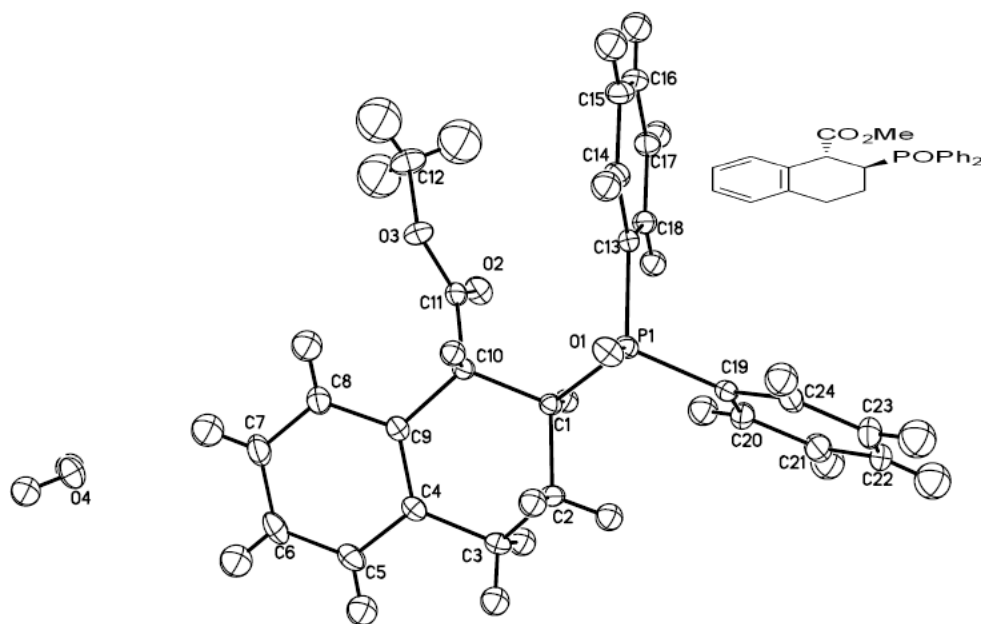

$C_{24}H_{25}O_4P$ ,  $M = 408.41$ , triclinic,  $a = 8.735(3) \text{ \AA}$ ,  $b = 11.975(4) \text{ \AA}$ ,  $c = 12.478(5) \text{ \AA}$ ,  $\alpha = 61.480(5)^\circ$ ,  $\beta = 69.536(3)^\circ$ ,  $\gamma = 80.201(7)^\circ$ ,  $U = 1074.5(6) \text{ \AA}^3$ ,  $T = 223(2) \text{ K}$ , space group  $P-1$ ,  $Z = 2$ ,  $D_c = 1.262 \text{ g/cm}^{-3}$ , Rigaku Saturn CCD diffractometer,  $\mu(\text{Mo-K}\alpha) = 0.155 \text{ mm}^{-1}$ , 9895 independent reflections (4850 observed), 270 parameters,  $R_{\text{int}} = 0.0379$ ,  $R = 0.0465$ ,  $wR(F_2) = 0.0866$ , thermal ellipsoids probability level is 20%. CCDC 816923.

### 8d

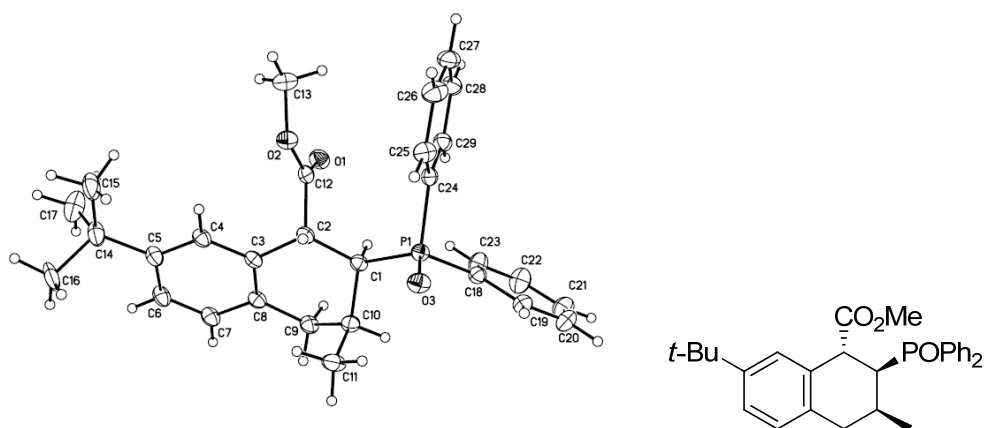

$C_{29}H_{33}O_3P$ ,  $M = 460.52$ , monoclinic,  $a = 12.3944(14) \text{ \AA}$ ,  $b = 15.6919(19) \text{ \AA}$ ,  $c = 13.1793(16) \text{ \AA}$ ,  $\alpha = 90^\circ$ ,  $\beta = 94.749(3)^\circ$ ,  $\gamma = 90^\circ$ ,  $U = 2554.5(5) \text{ \AA}^3$ ,  $T = 223(2) \text{ K}$ , space group  $P 2_1/n$ ,  $Z = 4$ ,  $D_c = 1.197 \text{ g/cm}^{-3}$ , Rigaku Saturn CCD diffractometer,  $\mu(\text{Mo-K}\alpha) = 0.135 \text{ mm}^{-1}$ , 14357 independent reflections (5831 observed), 334 parameters,  $R_{\text{int}} = 0.0265$ ,  $R = 0.0523$ ,  $wR(F_2) = 0.1312$ , thermal ellipsoids probability level is 25%. CCDC 824309.
